# Supplementary material for: Psychometric validation of Swedish and Arabic versions of two health literacy questionnaires, eHEALS and HLS-EU-Q16, for use in a Swedish context: a study protocol
Source: PubMed Central journal article supplement — BMJ Open. 2019 Sep 17;9(9):e029668. doi: 10.1136/bmjopen-2019-029668 (PMC6756328; doi:10.1136/bmjopen-2019-029668), 2019-09-17
Supplement: bmjopen-2019-029668.draft_revisions.pdf [file bmjopen-2019-029668.draft_revisions.pdf]

# BMJ Open

BMJ Open is committed to open peer review. As part of this commitment we make the peer review history of every article we publish publicly available.

When an article is published we post the peer reviewers' comments and the authors' responses online. We also post the versions of the paper that were used during peer review. These are the versions that the peer review comments apply to.

The versions of the paper that follow are the versions that were submitted during the peer review process. They are not the versions of record or the final published versions. They should not be cited or distributed as the published version of this manuscript.

BMJ Open is an open access journal and the full, final, typeset and author-corrected version of record of the manuscript is available on our site with no access controls, subscription charges or pay-per-view fees (<http://bmjopen.bmj.com>).

If you have any questions on BMJ Open's open peer review process please email [info.bmjopen@bmj.com](mailto:info.bmjopen@bmj.com)

# BMJ Open

## Psychometric validation of Swedish and Arabic versions of two Health literacy questionnaires, eHEALS and HLS-EU-Q16, for use in a Swedish context: A study protocol

|                               |                                                                                                                                                                                                                                                                                                                                                                                                                                                                                                                                                                                                                                                          |
|-------------------------------|----------------------------------------------------------------------------------------------------------------------------------------------------------------------------------------------------------------------------------------------------------------------------------------------------------------------------------------------------------------------------------------------------------------------------------------------------------------------------------------------------------------------------------------------------------------------------------------------------------------------------------------------------------|
| Journal:                      | <i>BMJ Open</i>                                                                                                                                                                                                                                                                                                                                                                                                                                                                                                                                                                                                                                          |
| Manuscript ID                 | bmjopen-2019-029668                                                                                                                                                                                                                                                                                                                                                                                                                                                                                                                                                                                                                                      |
| Article Type:                 | Protocol                                                                                                                                                                                                                                                                                                                                                                                                                                                                                                                                                                                                                                                 |
| Date Submitted by the Author: | 06-Feb-2019                                                                                                                                                                                                                                                                                                                                                                                                                                                                                                                                                                                                                                              |
| Complete List of Authors:     | Wangdahl, Josefin M.; Uppsala Univ, Department of Public Health and Caring Sciences; Karolinska Institutet, Department of Neurobiology, Care Sciences and Society, Karolinska Institutet<br>Dahlberg, Karuna; Örebro University, Sweden, Faculty of Health and Medical Sciences, School of Health and Medical Sciences<br>Jaensson, Maria; Örebro University, Sweden, Faculty of Health and Medical Sciences, School of Health and Medical Sciences<br>Nilsson, Ulrica; Karolinska Institutet, Department of Neurobiology, Care Sciences and Society, Karolinska Institutet; Karolinska Universitetssjukhuset, Perioperative Medicine and Intensive Care |
| Keywords:                     | health literacy, psychometric evaluation, eHealth                                                                                                                                                                                                                                                                                                                                                                                                                                                                                                                                                                                                        |
|                               |                                                                                                                                                                                                                                                                                                                                                                                                                                                                                                                                                                                                                                                          |

SCHOLARONE™  
Manuscripts

1  
2  
3  
4  
5  
6  
7  
8  
9  
10  
11  
12  
13  
14  
15  
16  
17  
18  
19  
20  
21  
22  
23  
24  
25  
26  
27  
28  
29  
30  
31  
32  
33  
34  
35  
36  
37  
38  
39  
40  
41  
42  
43  
44  
45  
46  
47  
48  
49  
50  
51  
52  
53  
54  
55  
56  
57  
58  
59  
60

## Psychometric validation of Swedish and Arabic versions of two Health literacy questionnaires, eHEALS and HLS-EU-Q16, for use in a Swedish context: A study protocol

Josefin Wångdahl<sup>1,2</sup>, Karuna Dahlberg<sup>3</sup>, Maria Jaensson<sup>3</sup>, Ulrica Nilsson<sup>2,4</sup>

1. Department of Public Health and Caring Sciences, Uppsala University, Uppsala, Sweden.
2. Department of Neurobiology, Care Sciences, and Society, Karolinska Institute.
3. School of Health Sciences, Faculty of Medicine and Health, Örebro University, Örebro, Sweden.
4. Department of Perioperative Medicine and Intensive Care, Karolinska University Hospital, Stockholm, Sweden

### Corresponding author:

Ulrica Nilsson

Division of Nursing

Department of Neurobiology, Care Sciences and Society

Karolinska Institute

Alfred Nobels Allé 23, C3

141 83 Huddinge, Sweden

Phone +46 8-524 838 22

Fax +46 08-524 868 09

**Keywords:** Migrants; eHealth; literacy: psychometric evaluation; Arabic; Swedish

**Word Count:** 3714

## ABSTRACT

### Introduction

Equity in health and access to health care regardless of, gender, ethnicity or social position is a major political issue worldwide. Regardless of an individual's knowledge, motivation, and competence individuals are expected to be engaged and take responsibility of their own care. Migrants have been identified as a vulnerable population in health care and an explanation for the inequity in health, and in health care is limited health literacy. Further more, with increasing digitalization in health care, it puts demand on the individual to also have digital or electronic health (eHealth) literacy.

The overall aim of this study is to psychometric evaluate the Swedish and Arabic versions of HLS-EU-Q16 and eHEALS, and to compare Arabic and Swedish speakers' Health literacy and eHealth literacy levels in Sweden.

### Methods and Analysis

This is a prospective, psychometric evaluation study with the intent of including 300 Arabic speaking and 300 Swedish speaking participants. Questionnaires: The Health Literacy Survey European Questionnaire (HLS-EU-Q16) including 16 items measuring perceived personal skills of finding, understanding, judging, and applying health information to maintain and improve their health. The eHealth literacy scale (eHEALS), an 8-item measuring health literacy skills in relation to online information and applications.

This study will be conducted in four phases. Phase 1: Translation of HLS-EU-Q16 and eHEALS from English to Swedish and Arabic following the principles of translation of questionnaires. Phase 2: Content validity testing of eHEALS, including face validity and interpretability conducted with five Arabic and five Swedish speaking participants. Phase 3: Psychometric testing including construct validity, reliability, feasibility and floor ceiling effects. Phase 4: Distribution and comparison of eHealth and HLS-EU-Q16 analysed with Chi square and Fisher's exact test as appropriate. To assess associations between HLS-EU-Q16, eHEALS and demographic variables binary logistic regression analyses will be performed.

## **Ethics and dissemination**

The project has been approved by the regional ethical review board in Stockholm, Sweden (2019/5:1) and will follow the principles outlined in the 1964 Helsinki Declaration and its later amendments. Results from this study will be disseminated in peer-reviewed journals, scientific conferences and in social media.

## **ARTICLE SUMMARY**

### **Strengths and limitations**

- A Swedish and Arabic version of eHEALS and HLS-EU-Q16 have not yet been psychometric evaluated
- eHealth literacy has not previously been investigated in a Swedish population.
- This is the first study to compare eHealth literacy between Swedish and Arabic speaking citizens in Sweden.
- Although this study includes both Swedish and Arabic speaking participants from different contexts in the society the study is conducted in Sweden and may not be generalizable to other contexts.

## INTRODUCTION

### *The importance of health literacy*

Patients in today's health care system are expected to take part and be engaged in their own care. Consequently, they have to be able to read and understand health instructions on how to manage their own recovery at home <sup>1</sup>. Informed decision making requires people to have a certain level of health literacy when self-reporting measurements and health information. In this article we use the following definition of comprehensive health literacy:

Health literacy is linked to literacy and entails people's knowledge, motivation, and competence to access, understand, appraise, and apply health information in order to make judgments and take decisions in everyday life concerning healthcare, disease prevention and health promotion to maintain or improve quality of life during the life course<sup>2</sup>.

Health literacy is regarded as a social determinant of health <sup>3</sup> and has a strong social gradient <sup>4</sup>. Which means, health literacy can be an additional barrier to health for already disadvantaged and marginalised groups within societies. Limited health literacy is likely to affect patients' quality of care, resulting in lower satisfaction with care and lower understanding of their medical situation <sup>5</sup> and their safety, by decreasing the probability of an adverse medication due to misunderstanding instructions <sup>5,6</sup>. Health literacy is also associated with the extent to which people benefit from health examinations <sup>7</sup> and the quality of their postoperative recovery <sup>8</sup>.

With increasing digitalisation of information and services, modern health care and health promotion have become increasingly challenging for both patients and health care staff<sup>9</sup>. This demands a range of digital competencies among users, and requires new ways to describe and evaluate users' digital capabilities and experiences in this rapidly changing health context <sup>9</sup>. Consequently, the concept of digital or electronic health (eHealth) literacy has emerged <sup>10-12</sup> and been described as 'the ability to seek, find, understand, and appraise health information from electronic sources and apply the knowledge gained to addressing or solving a health problem' <sup>12</sup>.

1  
2  
3 Equity in health and access to health care regardless of social position, gender, race, or  
4 ethnicity is a major political issue in the European Region and worldwide <sup>13</sup>. The Swedish  
5 Health and Medical Services Act <sup>14</sup> states that the goal of health care is to promote ‘good  
6 health and care on equal terms for the entire population’ <sup>6, 14</sup>. Migrants, whether they are  
7 labour migrants or refugees, have been identified as a vulnerable population, but there is  
8 heterogeneity in the degree to which they are vulnerable to inadequate health care <sup>5, 6, 15, 16</sup>.  
9 One explanatory factor for the inequity in health, and in health care is limited health literacy  
10 on individual and organizational level <sup>17</sup>. A Swedish study show for example that newly  
11 arrived refugees with limited health literacy, to a higher degree experienced poor quality of  
12 communication and benefited less from the health examination for asylum seekers than those  
13 with higher health literacy <sup>7</sup>. Another study show that newly arrived refugees with limited  
14 comprehensive health literacy have poorer general health and do not seek needed care as often  
15 as those with higher comprehensive health literacy <sup>18</sup>.  
16  
17  
18  
19  
20  
21  
22  
23  
24  
25  
26

### 27 *HLS-EU-Q16*

28  
29 In 2011-2012, Sørensen et al. developed the Health Literacy Survey European Questionnaire,  
30 HLS-EUQ47, a self-reporting instrument consisting of 47 items <sup>19</sup>. The instrument is based on  
31 a systematic literature review that derived an all-inclusive conceptual model and the definition  
32 of comprehensive health literacy used in this study. In 2013, the instrument was used in a  
33 large study including populations in 8 European countries <sup>4</sup>. As a result of that study’s  
34 analysis, the shorter 16-item version, HLS-EU-Q16, was developed <sup>2</sup>. Both the HLS-EUQ47  
35 and HLS-EU-Q16 have been used frequently in many different countries and are available in  
36 a range of languages <sup>2, 18, 20-24</sup>.  
37  
38  
39  
40  
41  
42  
43

44 The HLS-EU-Q16 aims to measure respondents’ perceived personal skills of finding,  
45 understanding, judging, and applying health information to maintain and improve their health  
46 <sup>19</sup>. Each item in the instrument is answered on a 4-point Likert scale with response options  
47 ranging from ‘very difficult’ to ‘very easy’. An overall HLS-EU-Q16 index will be calculated  
48 in three steps according to the developer<sup>20, 25</sup>. First, the response categories for the 16 items  
49 will be dichotomized into easy (fairly easy and easy) giving the value of 1, and difficult  
50 (difficult and very difficult) giving the value 0. Second, an overall sum score will be  
51 calculated. Third, sum scores will be divided into three categories: inadequate (0-8 score  
52 points), problematic (9-12 score points) and sufficient (13-16 score points) health literacy.  
53  
54  
55  
56  
57  
58  
59  
60

1  
2  
3 . HLS-EUQ16 has been psychometrically tested and showed to be in some migrant  
4 populations in which it was found to be reliable and valid <sup>20, 26</sup>.  
5  
6  
7

8 The Arabic and Swedish versions of HLS-EU-Q16 have been translated in line with  
9 guidelines for the translation of instruments and tested for Face validity among migrants in  
10 Sweden <sup>27</sup>. The Swedish and Arabic versions of the HLS-EU-Q16 have since been used in  
11 several studies in Sweden <sup>7, 18, 28</sup> and Egypt <sup>23</sup>. However, the translated Swedish and Arabic  
12 versions have not yet been tested for other aspects of validity and comprehensive health  
13 literacy has not been compared between Swedish- and non-Swedish-speaking people.  
14  
15  
16  
17  
18  
19

### 20 *eHEALS*

21 In 2006, Norman and Skinner developed the eHealth literacy scale, eHEALS. It aims to  
22 measure a broad range of literacy skills, which might make it useful in assessing the effects of  
23 strategies to deliver online information and applications. eHEALS is an 8-item instrument  
24 with each item scored on a 5-point Likert scale with response options ranging from ‘strongly  
25 agree’ to ‘strongly disagree’. Total scores on the eHEALS range from 8 to 40, with higher  
26 scores representing higher self-perceived eHealth literacy.  
27  
28  
29  
30  
31  
32  
33

34 The eHEALS is available in a range of languages <sup>11, 12, 29-33 34-36</sup> and the English version has  
35 been successfully administered digitally via telephone <sup>37</sup>. Tests of the validity of eHEALS  
36 indicates that it is a reliable and valid instrument<sup>12, 30, 38-40</sup> but also that the validity of if it  
37 requires further investigation <sup>11</sup>. However, the eHEALS has not been tested for validity  
38 among the general Swedish- or Arabic-speaking population in Sweden. eHealth literacy has  
39 not been examined in Sweden nor compared between Swedish- and non-Swedish-speaking  
40 people.  
41  
42  
43  
44  
45  
46  
47

### 48 **Aim**

49  
50  
51 The overall aim of this study is to psychometric evaluate the Swedish and Arabic versions of  
52 HLS-EU-Q16 and eHEALS, and to compare Arabic and Swedish speakers’ Health literacy  
53 and eHealth literacy levels in Sweden.  
54  
55  
56  
57  
58  
59  
60



## METHODS AND ANALYSIS

### Study design

This is a prospective, psychometric and comparative evaluation divided into four different phases (Figure 1). Study recruitment will start in February 2019 and is planned to end in June 2019.

### Phase 1: Translation process

The original English version of eHEALS will be translated into Swedish and Arabic. Arabic was selected as it is the most common native language spoken among refugees in Sweden <sup>41</sup>. One independent translator each with either Swedish or Arabic as their native language will translate the English version of eHEALS to Swedish and Arabic. These translations should use plain language and be comprehensible to a 12-year-old speaker of the target language <sup>42</sup>. Although it is important that the content of the items remain the same as in the original version, the wording or word order in the translated versions should be appropriate to the target language and understandable by speakers with various levels of education.

A translator group will consist of four professional translators, one for the forward translation into each of Swedish and Arabic and one for backward translations from each language. The translators will be recruited from translator associations found and through personal contacts. Previous experience in translating survey questions within the health domain will be a criterion for recruitment as a translator.

A committee to examine the quality of the translations will be recruited on the basis of criteria recommended for committees used in cross-cultural adaption projects <sup>43</sup>. The committee will consist of 12 members: 8 bilingual in English and Swedish and 4 multilingual in English, Arabic, and Swedish. The bilingual members should have experience in plain language and health literacy and/or health communication. Multilingual members should have experiences from data collections with Arabic speaking participants within the public health domain and previous experience of reviewing translated instruments.

The translation into Swedish will be completed first and reviewed by the researchers, who will compare it with the original English version, examine how well it fits the Swedish

1  
2  
3 context, and check it for plain language. If necessary, adjustments will be made and the new  
4 versions discussed with the bilingual members in the committee to ensure that the content of  
5 the English and Swedish versions is the same and that plain language is used. The new  
6 versions will also be discussed with four Swedish-speaking lay-people of different ages,  
7 genders, and education levels to ensure the items are understandable. When the researchers  
8 are satisfied with the Swedish version, based on the feedback from the bilingual and lay-  
9 people, it will be back-translated into English and the researchers and the translator will  
10 compare it with the English original version. If the back-translation does not match the  
11 original eHEALS, the Swedish version will be adjusted and back-translated again as many  
12 times as necessary to obtain a back-translation consistent with the original English version.  
13  
14  
15  
16  
17  
18  
19  
20  
21

22 Once the Swedish version is finalized, the translated Arabic version will be reviewed by the  
23 four multilingual members in the committee, who together with the researchers, will discuss  
24 how well the translated version fits the Swedish context, to what extent plain language has  
25 been used, and how well the content of the translated version matches both the English  
26 original and the final Swedish versions. If necessary, adjustments will be made and the new  
27 versions discussed again with the multilingual members. When all are satisfied with the  
28 translated version, it will be back-translated into English by one independent translator and  
29 compared with the English original version by one of the multilingual members. If the back-  
30 translation does not match the English original version, it will be adjusted and back-translated  
31 again as many times as necessary to obtain a back-translation consistent with the original  
32 English version.  
33  
34  
35  
36  
37  
38  
39  
40  
41  
42

## **Phase 2: content validity testing of the Arabic and Swedish version of eHEALS**

### **Content validity**

43  
44  
45  
46  
47  
48 Content validity is the degree to which the content of an instrument is an adequate reflection  
49 of the construct it is meant to measure<sup>44</sup>. As the plan is to use the instruments in this study in  
50 the general population, i.e. in study populations they have been used previously in, no greater  
51 adaptations of the instruments are needed. Examination of the content of the instrument by an  
52 expert committees will therefore not be conducted. However, the face validity – the degree to  
53 which the items or the instrument as a whole appear to adequately reflect the construct to be  
54 measured<sup>44</sup> – and the interpretability of the items<sup>42</sup> will be examined.  
55  
56  
57  
58  
59  
60

1  
2  
3 The face validity of the final Swedish and Arabic versions will be tested through qualitative  
4 interviews with five people in each language group to check whether these people understand  
5 the items as intended. Participants will be recruited purposively and through snowball  
6 sampling <sup>45</sup> either directly by the researchers or through the researchers' personal contacts  
7 with key people in groups speaking Arabic. A mix of different ages, genders, and educational  
8 levels will be sought. Information about the project and the meaning of informed consent will  
9 be given orally and in writing to the participants. If the person agrees to attend, the time for  
10 the interview will be booked.  
11  
12

13  
14  
15  
16  
17 In the interview, participants will be asked 'What were you thinking of while you were  
18 answering that question?' and if necessary, 'Why did you select that response?' Interviews  
19 will be audio recorded and notes written by the interviewer into templates containing the two  
20 predetermined questions. Participants will also be asked about their age, gender, highest level  
21 of education, and years living in Sweden.  
22  
23  
24  
25

26  
27 The five Swedish-speaking participants will be interviewed by two of the researchers and the  
28 five Arabic-speaking participants by a research assistant with Arabic as native language, who  
29 will take notes in Swedish. Each interviewer will listen to the recorded audio files,  
30 complemented by the notes (if any) written immediately after each interview. The researchers,  
31 will then read all notes separately.  
32  
33  
34  
35  
36

37  
38 If the analysis shows that any items are difficult to understand and major changes to either  
39 translation are needed, the items concerned will be revised and tested again on five new  
40 participants. This procedure will be repeated until all items are easy to understand.  
41  
42  
43  
44

### 45 **Phase 3: Psychometric testing of the Arabic and Swedish version of eHEALS and HLS-** 46 **EU-Q16** 47

#### 48 **Participants** 49

50  
51 Two different language groups will be recruited from different regions in Sweden to test the  
52 translated instruments. The intention is to include one group of participants representative of  
53 the general Swedish-born population (n = 300) and one group representative of Swedish  
54 residents born in an Arabic-speaking country (n = 300). The chosen sample size was first  
55 guided by the 10:1 ratio <sup>42</sup>: 16 items on the HLS-EU-Q16 × 10 = 160 participants. However, a  
56  
57  
58  
59  
60

1  
2  
3 general rule of thumb for factor analysis is 300 cases or the more lenient 50 participants per  
4 factor <sup>46</sup>. HLS-EU-Q16 consists of only one factor <sup>19</sup>, therefore a sample size of 300  
5  
6 participants is considered most appropriate. Inclusion criteria for participation will be being  
7  
8 an adult ( $\geq 18$  years), having sufficient language skills to read, understand, and fill in a form in  
9  
10 their native language (Swedish or Arabic), and being available on the days of data collection.  
11  
12 Arabic speakers born outside of Sweden shall also have a Swedish resident's permit.  
13

14  
15 Participants will be recruited from university courses, municipal adult education courses  
16  
17 (Komvux), larger workplaces with both academic and non-academic staff, non-governmental  
18  
19 organisations serving elderly people, migrant associations, courses in civic orientation, and  
20  
21 supplementary academic courses for nurses with degrees from countries outside of Europe.  
22  
23 These arenas are chosen because they attract many Swedish residents of different ages,  
24  
25 genders, and levels of education who speak Swedish or Arabic as their first language. A mix  
26  
27 of ages, genders, and educational levels will be sought in both groups. Upon recruitment of  
28  
29 the participants, organizations manager or responsible person conducting group activities with  
30  
31 potential study participants will be contacted and informed about the project.  
32

33  
34 On the day of the data collection, a researcher will visit the various arenas to inform people  
35  
36 both orally and in writing about the project and the meaning of informed consent. In groups  
37  
38 with Arabic-speaking people, the Arabic-speaking research assistant will provide the oral and  
39  
40 written information about the project and the meaning of informed consent in the potential  
41  
42 participants' native language. People who agree to participate will be given a questionnaire  
43  
44 and asked to fill it in directly onsite. By filling in the questionnaire, they also consent to take  
45  
46 part in the study.  
47

48  
49 The following questionnaires and study specific questions will be distributed in Swedish and  
50  
51 Arabic respectively depending on native language.  
52

- 53 - the eHEALS instrument (8 items) assessing eHealth literacy;
- 54 - the HLS-EU-Q16 instrument (16 items) assessing comprehensive health literacy;
- 55 - one question about general self-perceived health;
- 56 - one question about use of internet and,
- 57 - descriptive background questions (age, gender, highest level of education, country of  
58 birth).
- 59 - -number of years lived in Sweden. (Arabic-speaking group only).  
60

1  
2  
3  
4  
5 The questionnaire used in the Arabic-speaking group includes the same components, plus one  
6 question about their number of years lived in Sweden.  
7  
8  
9

10 General self-perceived health will be measured by the questions ‘How do you assess your  
11 overall health status?’ Response options are Very poor, Poor, Fair, Good, and Very good.<sup>7, 47</sup>  
12 Internet use will be measured by the question ‘How often do you use the internet?’ Response  
13 options are Almost every day, Several days a week, About 1 day a week, Less than 1 day a  
14 week, and Almost never<sup>11</sup>.  
15  
16  
17  
18  
19  
20

### 21 **Psychometric testing**

22 The psychometric testing will be guided by CONsensus-based Standards for the selection of  
23 health Measurement INstruments (COSMIN)<sup>42, 44, 48</sup>  
24  
25

### 26 **Construct validity**

27 The construct validity<sup>44</sup> focus on evaluating tests of the hypotheses. This aspect of construct  
28 validity can be described as the degree to which the scores of an instrument are consistent  
29 with a hypothesis<sup>44</sup>. The participants and questionnaire for collecting data, will be the same  
30 as those described above.  
31  
32  
33  
34  
35

36 Based on previous studies on health literacy showing positive associations between limited  
37 health literacy and high age<sup>4, 49-51</sup>, low education level<sup>23, 51, 52</sup>, poor health<sup>7, 8, 22, 50, 53</sup> and  
38 between eHEALS and low use of the Internet<sup>11</sup>, several hypotheses will be used regarding  
39 correlations between HLS-EU-Q16/eHEALS and; age, level of education, self-perceived  
40 general health and quantity of Internet use. Moreover, hypothesis regarding correlations  
41 between eHEALS and; HLS-EU-Q16 and certain HLS-EU-Q16 items will be used. All  
42 hypothesis are presented in Figure 2.  
43  
44  
45  
46  
47  
48  
49

50 Spearman’s rank order correlation between total mean scores on eHEALS and HLS-EU-Q16,  
51 self-perceived health, level of education, and age will be used to A coefficient magnitude of  
52 >0.4 will be considered evidence of construct validity (i.e., moderate to strong correlations)<sup>48</sup>.  
53  
54  
55  
56  
57  
58  
59  
60

## Reliability

Reliability can be used as a term for a domain and as a term for a measurement property<sup>44</sup>. In this study we are analyse two aspects of reliability: internal consistency and test-retest reliability.

### Internal consistency

Internal consistency describes the interrelatedness among items<sup>44</sup> and will be analysed for both eHEALS and HLS-EU-Q16.

- Exploratory factor analysis will be used to identify the underlying relationships between items on eHEALS and HLS-EU-Q16<sup>42</sup>.
- Cronbach's alpha will be calculated for each instrument to assess the average correlation of items within each scale. Cronbach's alpha in the range of 0.7–0.95 will be considered acceptable<sup>42, 54</sup>.
- Split-half reliability will be used to measure the correlation between random split segments and to determine how much error in a test score is due to poor test construction<sup>54</sup>. A Spearman-Brown coefficient of 0.70–0.90 will be considered acceptable<sup>55, 56</sup>.

### Test-retest reliability

Test-retest reliability can be described as the extent to which scores for the same patients are the same in measurements repeated over time<sup>44</sup>. Intraclass correlation coefficient (ICC) will be used and an ICC value of  $\geq 0.7$  will be considered acceptable<sup>42</sup>. Because the sample size needed for test-retest is much smaller than for testing many other forms of validity, the sample size in the retest of 25 people per language category (total 50) is considered appropriate<sup>57</sup>.

Participants in the test-retest groups will be invited to take part in the retest when they are recruited to participate in the main test. To minimise dropouts, participants in the test-retest groups will be recruited in the pre-existing groups having regular, at least weekly, meetings. A mix of different ages, genders, and education levels will be sought. To compare answers from the test and the retest, the participants will mark their questionnaires with their birth date or any other self-contained code if they do not wish to give their date of birth. If they use their

1  
2  
3 own code, they will be asked to write it down in a list of codes the researcher will bring to the  
4 second measurement in case they forget their code.  
5  
6  
7

### 8 **Feasibility**

9  
10 The feasibility of the clinical user-friendliness of the instruments will be assessed by their  
11 successful response rate <sup>48</sup>.  
12  
13  
14

### 15 **Floor and ceiling effects**

16 Floor and ceiling effects (the number of respondents who achieve the lowest or highest  
17 possible scores<sup>42</sup> will be examined. Floor or ceiling effects are considered a problem if more  
18 than 15% of a study population achieve the lowest or highest possible score<sup>42</sup>.  
19  
20  
21  
22  
23  
24  
25

### 26 **Phase 4. Distribution of eHEALS and HLS-EU-Q16 levels in the study population and** 27 **comparisons of levels in the two language groups**

28 The distribution of eHEALS and HLS-EU-Q16 levels in the study population as a whole and  
29 within each language group will be examined. Chi-square tests – or Fisher’s exact tests as  
30 appropriate – will be used to test for differences in eHEALS and HLS-EU-Q16 between  
31 language groups. Binary logistic regression analyses will be performed to assess associations  
32 between HLS-EU-Q16 and eHEALS as independent variables, and age, education level,  
33 gender, country of birth, general self-perceived health, and internet use as dependent  
34 variables.  
35  
36  
37  
38  
39  
40  
41

42 All data will be analysed using SPSS version 24.0 for Windows (IBM Corporation, Somers,  
43 NY, USA). Two-tailed *P* values under .05 will be considered significant.  
44  
45  
46  
47  
48  
49

### 50 **Discussion**

51 A considerable proportion of both the European population and newly arrived refugees in  
52 Sweden have limited comprehensive health literacy <sup>4</sup>. How this is distributed in the general  
53 Swedish population and the eHealth literacy levels of Swedish- and Arabic-speaking people  
54 living in Sweden are rather unknown. Knowledge about comprehensive health literacy (and  
55 by extension, eHealth literacy) is important, though, as it is associated with people’s health  
56  
57  
58  
59  
60

1  
2  
3 status <sup>17</sup>, use of health information and health care services <sup>5, 6, 35, 49, 58</sup>. Being regarded as an  
4 important social determinant of health <sup>3</sup> and having a social gradient health literacy<sup>4</sup> in  
5 patients is important to consider in work to promote health, disease prevention, and health  
6 care, in order to secure that people with various levels of health literacy benefit equally from  
7 health efforts to reduce the risk of promote inequity in health and healthcare instead of vice  
8 versa <sup>17</sup>. However, in Sweden validated instruments to measure comprehensive health literacy  
9 and eHealth literacy of Swedish-, and Arabic-speaking people are lacking, i.e. needs to be  
10 developed.  
11  
12  
13  
14  
15  
16  
17  
18

19 Our research team has developed and tested a digital monitoring system, Recovery  
20 Assessment by Phone Points (RAPP), that enables day surgery patients to contact health care  
21 easily and to report from home about how they feel <sup>59</sup>. It has been tested in studies with  
22 Swedish-speaking patients, and proved to be cost-effective <sup>60</sup>, to help patients feel safer and  
23 less bothered by symptoms, such as pain, nausea, anxiety, in their postoperative recovery <sup>59</sup>.  
24 <sup>61</sup>. Strong relationships between postoperative recovery, health, and mental health were also  
25 found. However, so far RAPP is only available to Swedish-speaking patients. Next step is to  
26 develop RAPP for non-Swedish-speakers, starting with Arabic, and to compare postoperative  
27 recovery and unplanned medical contacts between non-Swedish-speaking Arabic patients and  
28 Swedish-speaking patients. We will then also study differences in eHealth literacy, mental  
29 health, and postoperative recovery between the groups, and describe their experiences of  
30 postoperative recovery and using a digital tracking system such as RAPP. However, before  
31 we can investigate these questions, we need to develop valid Arabic and Swedish version of  
32 eHEALS to be able to assess eHealth literacy.  
33  
34  
35  
36  
37  
38  
39  
40  
41  
42  
43  
44

### 45 **Ethics and dissemination**

46 The project has been approved by the regional ethical review board in Stockholm, Sweden  
47 (number 2019/5:1) and will follow the principles outlined in the 1964 Helsinki Declaration  
48 and its later amendments. Participants will receive written and verbal information about the  
49 study, including the purpose and procedures, the voluntary nature of participation, and their  
50 option to withdraw at any time. They will also be guaranteed confidentiality and secure data  
51 storage.  
52  
53  
54  
55  
56  
57  
58  
59  
60



1  
2  
3 This is an open-access article distributed under the terms of the Creative Commons  
4 Attribution Non-commercial License, which permits use, distribution, and reproduction in any  
5 medium, provided the original work is properly cited, and the use is non-commercial and  
6 otherwise in compliance with the license. See: <http://creativecommons.org/licenses/by-nc/2.0/> and <http://creativecommons.org/licenses/by-nc/2.0/legalcode>.  
7  
8  
9  
10  
11  
12

### 13 **Authors' contributions**

14 JW have contributed to the planning of the study, study design, the preparation of the  
15 manuscript and approved of the final version.

16 KD have contributed to the planning of the study, study design, the preparation of the  
17 manuscript and approved of the final version.

18 MJ have contributed to the planning of the study, study design, the preparation of the  
19 manuscript and approved of the final version.

20 UN have contributed to the planning of the study, study design, the preparation of the  
21 manuscript, led the calculation of sample size and approved of the final version.  
22  
23  
24  
25  
26  
27  
28  
29

### 30 **Patient and Public Involvement**

31 No public involvement  
32  
33  
34  
35

### 36 **Funding statement**

37 This research received no specific grant from any funding agency in the public, commercial or  
38 not-for-profit sectors  
39  
40  
41  
42

### 43 **Competing interests**

44 None  
45  
46  
47  
48

### 49 **References**

- 50 1. Koster E, Schmidt A, Philbert D, van de Garde E, Bouvy M. Health literacy of patients  
51 admitted for elective surgery. *Journal of Public Health* 2017;25(2):181-6.
- 52 2. Sørensen K, Van den Broucke S, Fullam J, Doyle G, Pelikan J, Slonska Z, et al. Health  
53 literacy and public health: a systematic review and integration of definitions and models. *BMC Public*  
54 *Health*. 2012;12(1):80.
- 55 3. Kickbusch IS. Health literacy: addressing the health and education divide. *Health*  
56 *Promot Int*. 2001;16(3):289-97.  
57  
58  
59  
60

- 1
- 2
- 3
4. Sørensen K, Pelikan JM, Röthlin F, Ganahl K, Slonska Z, Doyle G, et al. Health literacy in Europe: comparative results of the European health literacy survey (HLS-EU). *Eur J Public Health*. 2015;25(6):1053-8.
5. Kirmayer LJ, Narasiah L, Munoz M, Rashid M, Ryder AG, Guzder J, et al. Common mental health problems in immigrants and refugees: general approach in primary care. *Can Med Assoc J*. 2011;183(12):E959-E67.
6. Sundquist J. Migration, equality and access to health care services. BMJ Publishing Group Ltd; 2001.
7. Wångdahl J, Lytsy P, Mårtensson L, Westerling R. Health literacy and refugees' experiences of the health examination for asylum seekers—a Swedish cross-sectional study. *BMC Public Health*. 2015;15(1):1162.
8. Hälleberg-Nyman M, Nilsson U, Dahlberg K, Jaensson M. The association between functional health literacy and postoperative recovery, healthcare contacts and health related quality of life among patients undergoing day surgery. *JAMA Surgery*. 2018;153(8):1-8.
9. Kayser L, Karnoe A, Furstrand D, Batterham R, Christensen KB, Elsworth G, et al. A multidimensional tool based on the eHealth literacy framework: development and initial validity testing of the eHealth literacy questionnaire (eHLQ). *J Med Internet Res*. 2018;20(2).
10. Norgaard O, Furstrand D, Klokke L, Karnoe A, Batterham R, Kayser L, et al. The e-health literacy framework: a conceptual framework for characterizing e-health users and their interaction with e-health systems. *J Med Internet Res*. 2015;7(4):522-40.
11. Van der Vaart R, van Deursen AJ, Drossaert CH, Taal E, van Dijk JA, van de Laar MA. Does the eHealth Literacy Scale (eHEALS) measure what it intends to measure? Validation of a Dutch version of the eHEALS in two adult populations. *Journal of medical Internet research*. 2011;13(4).
12. Norman CD, Skinner HA. eHEALS: the eHealth literacy scale. *J Med Internet Res*. 2006;8(4).
13. Cf OdDS. Transforming our world: The 2030 agenda for sustainable development. <https://sustainabledevelopment.un.org/post2015/transformingourworld>: 2015 Contract No.: 31-01-2019.
14. sjukvårdslag H-o. Svensk författningssamling 2017:30. Stockholm, Sweden: Socialdepartementet 2017:13.
15. Wiking E, Johansson S-E, Sundquist J. Ethnicity, acculturation, and self reported health. A population based study among immigrants from Poland, Turkey, and Iran in Sweden. *J Epidemiol Community Health*. 2004;58(7):574-82.
16. Derose KP, Escarce JJ, Lurie N. Immigrants and health care: sources of vulnerability. *Health Aff (Millwood)*. 2007;26(5):1258-68.
17. Wångdahl J. Health literacy among newly arrived refugees in Sweden and implications for health and healthcare: *Acta Universitatis Upsaliensis*; 2017.
18. Wångdahl J, Lytsy P, Mårtensson L, Westerling R. Poor health and refraining from seeking healthcare are associated with comprehensive health literacy among refugees: a Swedish cross-sectional study. *International journal of public health*. 2018;63(3):409-19.
19. Sørensen K, Van den Broucke S, Pelikan JM, Fullam J, Doyle G, Slonska Z, et al. Measuring health literacy in populations: illuminating the design and development process of the European Health Literacy Survey Questionnaire (HLS-EU-Q). *BMC Public Health*. 2013;13(1):948.
20. Pelikan JM, Ganahl K. Die europäische Gesundheitskompetenz-Studie: Konzept, Instrument und ausgewählte Ergebnisse. *Health Literacy Forschungsstand und Perspektiven* Bern: Hogrefe. 2017:93-126.
21. Wångdahl J, Åhs A. Projekt Athena: En användbar metod för att främja närhet till arbetsmarknaden och hälsa hos långtidsarbetslösa utlandsfödda kvinnor? Uppsala: Uppsala universitet; 2014.
22. Levin-Zamir D, Baron-Epel OB, Cohen V, Elhayany A. The association of health literacy with health behavior, socioeconomic indicators, and self-assessed health from a national adult survey in Israel. *Journal of health communication*. 2016;21(sup2):61-8.

23. Almaleh R, Helmy Y, Farhat E, Hasan H, Abdelhafez A. Assessment of health literacy among outpatient clinics attendees at Ain Shams University Hospitals, Egypt: a cross-sectional study. *Public Health*. 2017;151:137-45.
24. Gele AA, Pettersen KS, Torheim LE, Kumar B. Health literacy: the missing link in improving the health of Somali immigrant women in Oslo. *BMC Public Health*. 2016;16(1):1134.
25. Pelikan J, Röthlin F, Canahl K. Introduction to HL measurement procedures of the HLS-EU study, . 2nd European HL Conference; Aarhus2014.
26. Emiral G, Aygar H, Isiktekin B, Göktaş S, Dagtekin G, Arslantas D, et al. Health literacy scale-European union-Q16: a validity and reliability study in Turkey. *International Research Journal of Medical Sciences*. 2018;6(1):1-7.
27. Wångdahl JM, Mårtensson L. The Communicative and Critical health literacy scale—Swedish version. *Scandinavian journal of public health*. 2014;42(1):25-31.
28. Wångdahl J, Lytsy P, Mårtensson L, Westerling R. Health literacy among refugees in Sweden—a cross-sectional study. *BMC public health* 2014;14(1):1030.
29. Paige SR, Krieger JL, Stollefson M, Alber JM, counseling. eHealth literacy in chronic disease patients: an item response theory analysis of the eHealth literacy scale (eHEALS). *Patient Educ Couns*. 2017;100(2):320-6.
30. Paramio GP, Almagro B, Hernando ÁG, Aguaded JG. Validation of the eHealth literacy scale (eHEALS) in Spanish university students. *Rev Esp Salud Publica*. 2015;89(3):329-38.
31. Mitsutake S, Shibata A, Ishii K, Okazaki K, Oka K. Developing Japanese version of the eHealth literacy scale (eHEALS). *Japanese journal of public health*. 2011;58(5):361-71.
32. Soellner R, Huber S, Reder M. The concept of eHealth literacy and its measurement. *Journal of Media Psychology*. 2014.
33. Efthymiou A, Middleton N, Charalambous A, Papastavrou E. The Association of Health Literacy and Electronic Health Literacy With Self-Efficacy, Coping, and Caregiving Perceptions Among Carers of People With Dementia: Research Protocol for a Descriptive Correlational Study. *JMIR research protocols*. 2017;6(11).
34. Diviani N, Dima AL, Schulz PJ. A psychometric analysis of the Italian version of the eHealth literacy scale using item response and classical test theory methods. *J Med Internet Res*. 2017;19(4).
35. Cardoso Tomás C, Pina Queirós PJ, Rodrigues Ferreira TdJ. Analysis of the psychometric properties of the portuguese version of an eHealth literacy assessment tool. *Revista de Enfermagem Referência*. 2014;4(2).
36. Chang A, Schulz P. The Measurements and an Elaborated Understanding of Chinese eHealth Literacy (C-eHEALS) in Chronic Patients in China. *International journal of environmental research*. 2018;15(7):1553.
37. Stollefson M, Paige SR, Tennant B, Alber JM, Chaney BH, Chaney D, et al. Reliability and Validity of the Telephone-Based eHealth Literacy Scale Among Older Adults: Cross-Sectional Survey. *J Med Internet Res*. 2017;19(10).
38. Nguyen G, Gambashidze N, Ilyas SA, Pascu D. Validation of the safety attitudes questionnaire (short form 2006) in Italian in hospitals in the northeast of Italy. *BMC Health Serv Res*. 2015;15(1):284.
39. Richtering SS, Morris R, Soh S-E, Barker A, Bampi F, Neubeck L, et al. Examination of an eHealth literacy scale and a health literacy scale in a population with moderate to high cardiovascular risk: Rasch analyses. *PLoS One*. 2017;12(4):e0175372.
40. Koo M, Norman CD, Hsiao-Mei C. Psychometric evaluation of a Chinese version of the eHealth literacy scale (eHEALS) in school age children. *Global Journal of Health Education*. 2012;15(1).

- 1
- 2
- 3
- 4 41. Statistiska c. Utländska medborgare i riket efter medborgarskapsland, ålder och kön. År 1973 - 2017. <https://www.scb.se/hitta-statistik/statistik-efter-amne/befolkning/befolkningens-sammansattning/befolkningsstatistik/>; Statistiska, centralbyrån; 2018 [cited 2018 12 October].
- 5
- 6 42. Terwee CB, Bot SD, de Boer MR, van der Windt DA, Knol DL, Dekker J, et al. Quality
- 7 criteria were proposed for measurement properties of health status questionnaires. *J Clin Epidemiol*.
- 8 2007;60(1):34-42.
- 9
- 10 43. Guillemin F, Bombardier C, Beaton D. Cross-cultural adaptation of health-related
- 11 quality of life measures: literature review and proposed guidelines. *J Clin Epidemiol*.
- 12 1993;46(12):1417-32.
- 13 44. Mokkink LB, Terwee CB, Patrick DL, Alonso J, Stratford PW, Knol DL, et al. The COSMIN
- 14 study reached international consensus on taxonomy, terminology, and definitions of measurement
- 15 properties for health-related patient-reported outcomes. *Journal of clinical epidemiology*.
- 16 2010;63(7):737-45.
- 17
- 18 45. Valerio MA, Rodriguez N, Winkler P, Lopez J, Dennison M, Liang Y, et al. Comparing
- 19 two sampling methods to engage hard-to-reach communities in research priority setting. *BMC Med*
- 20 *Res Methodol*. 2016;16(1):146.
- 21 46. VanVoorhis CW, Morgan BL. Understanding power and rules of thumb for determining
- 22 sample sizes. *Tutorials in Quantitative Methods for Psychology*. 2007;3(2):43-50.
- 23 47. Nielsen SS, Krasnik A. Poorer self-perceived health among migrants and ethnic
- 24 minorities versus the majority population in Europe: a systematic review. *International journal of*
- 25 *public health*. 2010;55(5):357-71.
- 26 48. De Vet HC, Terwee CB, Mokkink LB, Knol DL. *Measurement in medicine: a practical*
- 27 *guide*. Cambridge: Cambridge University Press; 2011.
- 28 49. Berkman ND, Sheridan SL, Donahue KE, Halpern DJ, Crotty K. Low health literacy and
- 29 health outcomes: an updated systematic review. *Ann Intern Med*. 2011;155(2):97-107.
- 30 50. Palumbo R, Annarumma C, Adinolfi P, Musella M, Piscopo G. The Italian Health
- 31 Literacy Project: Insights from the assessment of health literacy skills in Italy. *Health Policy*.
- 32 2016;120(9):1087-94.
- 33 51. Paasche-Orlow MK, Parker RM, Gazmararian JA, Nielsen-Bohlman LT, Rudd RR. The
- 34 prevalence of limited health literacy. *J Gen Intern Med*. 2005;20(2):175-84.
- 35 52. Ng E, Omariba DWR. Immigration, generational status and health literacy in Canada.
- 36 *Health Educ J*. 2014;73(6):668-82.
- 37 53. Easton P, Entwistle VA, Williams B. Health in the 'hidden population' of people with low
- 38 literacy. A systematic review of the literature. *BMC Public Health*. 2010;10(1):459.
- 39 54. Cronbach LJ. Coefficient alpha and the internal structure of tests. *Psychometrika*.
- 40 1951;16(3):297-334.
- 41 55. McDowell I. *Measuring health: a guide to rating scales and questionnaires*: Oxford
- 42 University Press, USA; 2006.
- 43 56. de Vet HC, Mokkink LB, Mosmuller DG, Terwee CB. Spearman–Brown prophecy
- 44 formula and Cronbach's alpha: different faces of reliability and opportunities for new applications.
- 45 *Journal of clinical epidemiology*. 2017;85:45-9.
- 46 57. Bujang MA, Baharum NJAoS. A simplified guide to determination of sample size
- 47 requirements for estimating the value of intraclass correlation coefficient: a review. 2017;12(1).
- 48 58. Rasu RS, Bawa WA, Suminski R, Snella K, Warady B, management. Health literacy
- 49 impact on national healthcare utilization and expenditure. *International journal of health policy*.
- 50 2015;4(11):747.
- 51 59. Jaensson M, Dahlberg K, Eriksson M, Nilsson U. Evaluation of postoperative recovery in
- 52 day surgery patients using a mobile phone application: a multicentre randomized trial. *Br J Anaesth*.
- 53 2017;119(5):1030-8.
- 54 60. Dahlberg K, Philipsson A, Hagberg L, Jaensson M, Hälleberg-Nyman M, Nilsson U. Cost-
- 55 effectiveness of a systematic e-assessed follow-up of postoperative recovery after day surgery: a
- 56 multicentre randomized trial. *Br J Anaesth*. 2017;119(5):1039-46.
- 57
- 58
- 59
- 60

1  
2  
3 61. Dahlberg K, Jaensson M, Nilsson U, Eriksson M, Odencrants S. Holding It Together—A  
4 Qualitative Study of Patients’ Perspectives on Postoperative Recovery When Using an e-Assessed  
5 Follow-Up. JMIR Mhealth Uhealth 2018;6(5):e10387. 2018;6(5):e10387.  
6  
7  
8  
9  
10  
11  
12  
13  
14  
15  
16  
17  
18  
19  
20  
21  
22  
23  
24  
25  
26  
27  
28  
29  
30  
31  
32  
33  
34  
35  
36  
37  
38  
39  
40  
41  
42  
43  
44  
45  
46  
47  
48  
49  
50  
51  
52  
53  
54  
55  
56  
57  
58  
59  
60

For peer review only

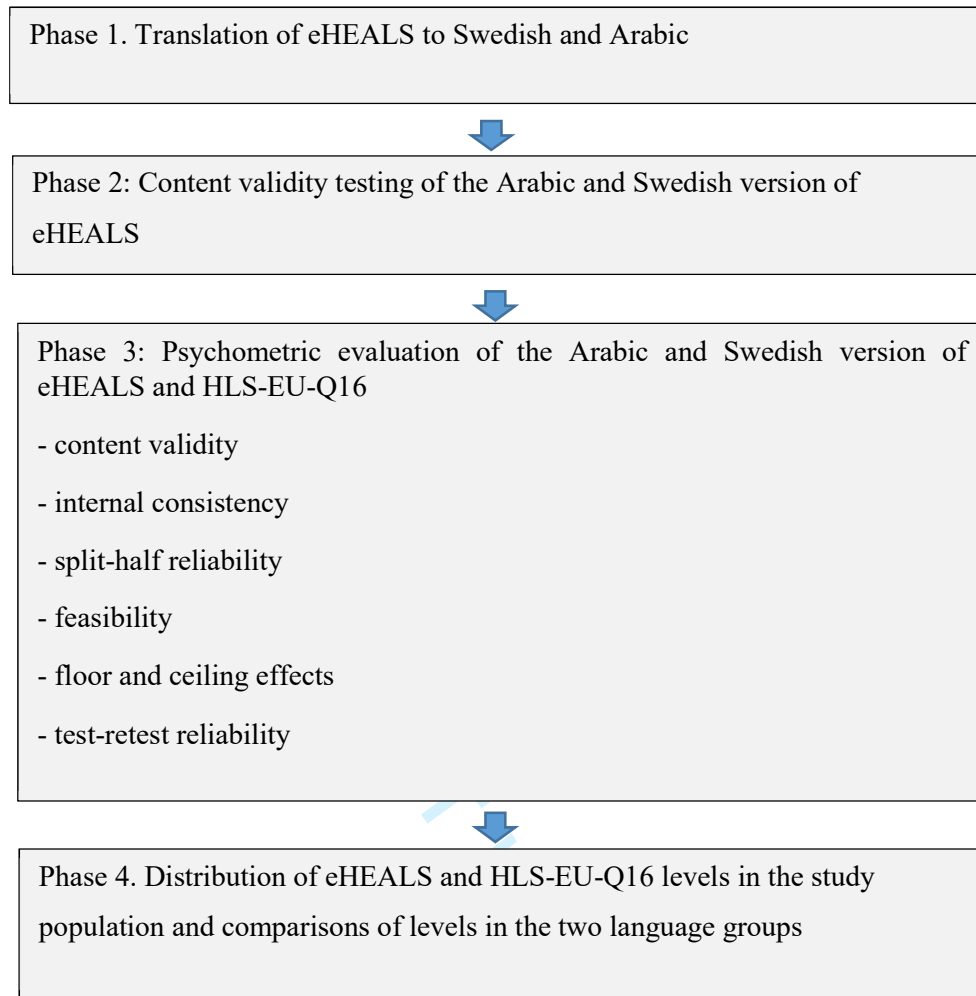

Figure 1. Overview of the research process.

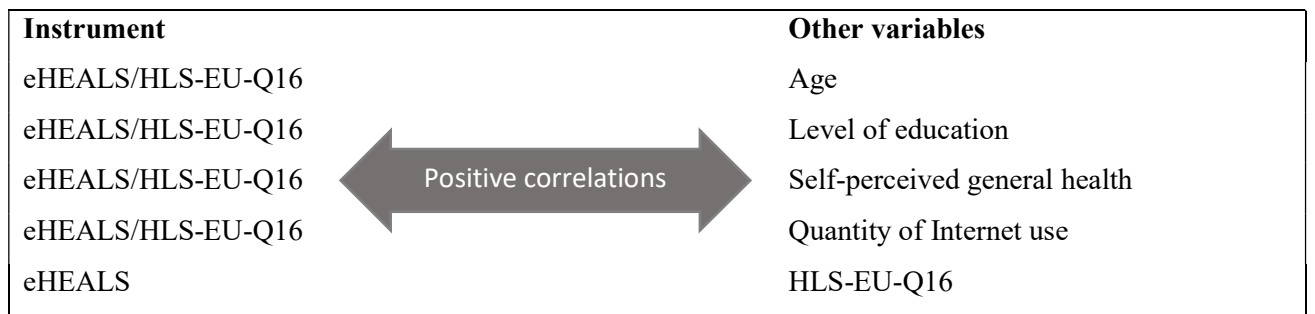

Figure 2. Hypothesis of correlations between eHEALS/HLS-EU-Q16 and various variables.

For peer review only

# BMJ Open

## Psychometric validation of Swedish and Arabic versions of two Health literacy questionnaires, eHEALS and HLS-EU-Q16, for use in a Swedish context: A study protocol

|                                 |                                                                                                                                                                                                                                                                                                                                                                                                                                                                                                                                                                                                                                                          |
|---------------------------------|----------------------------------------------------------------------------------------------------------------------------------------------------------------------------------------------------------------------------------------------------------------------------------------------------------------------------------------------------------------------------------------------------------------------------------------------------------------------------------------------------------------------------------------------------------------------------------------------------------------------------------------------------------|
| Journal:                        | <i>BMJ Open</i>                                                                                                                                                                                                                                                                                                                                                                                                                                                                                                                                                                                                                                          |
| Manuscript ID                   | bmjopen-2019-029668.R1                                                                                                                                                                                                                                                                                                                                                                                                                                                                                                                                                                                                                                   |
| Article Type:                   | Protocol                                                                                                                                                                                                                                                                                                                                                                                                                                                                                                                                                                                                                                                 |
| Date Submitted by the Author:   | 15-May-2019                                                                                                                                                                                                                                                                                                                                                                                                                                                                                                                                                                                                                                              |
| Complete List of Authors:       | Wangdahl, Josefin M.; Uppsala Univ, Department of Public Health and Caring Sciences; Karolinska Institutet, Department of Neurobiology, Care Sciences and Society, Karolinska Institutet<br>Dahlberg, Karuna; Örebro University, Sweden, Faculty of Health and Medical Sciences, School of Health and Medical Sciences<br>Jaensson, Maria; Örebro University, Sweden, Faculty of Health and Medical Sciences, School of Health and Medical Sciences<br>Nilsson, Ulrica; Karolinska Institutet, Department of Neurobiology, Care Sciences and Society, Karolinska Institutet; Karolinska Universitetssjukhuset, Perioperative Medicine and Intensive Care |
| <b>Primary Subject Heading</b>: | Research methods                                                                                                                                                                                                                                                                                                                                                                                                                                                                                                                                                                                                                                         |
| Secondary Subject Heading:      | Health informatics                                                                                                                                                                                                                                                                                                                                                                                                                                                                                                                                                                                                                                       |
| Keywords:                       | health literacy, psychmetric evaluation, eHealth                                                                                                                                                                                                                                                                                                                                                                                                                                                                                                                                                                                                         |
|                                 |                                                                                                                                                                                                                                                                                                                                                                                                                                                                                                                                                                                                                                                          |

SCHOLARONE™  
Manuscripts



1  
2  
3  
4  
5  
6  
7  
8  
9  
10  
11  
12  
13  
14  
15  
16  
17  
18  
19  
20  
21  
22  
23  
24  
25  
26  
27  
28  
29  
30  
31  
32  
33  
34  
35  
36  
37  
38  
39  
40  
41  
42  
43  
44  
45  
46  
47  
48  
49  
50  
51  
52  
53  
54  
55  
56  
57  
58  
59  
60

## Psychometric validation of Swedish and Arabic versions of two Health literacy questionnaires, eHEALS and HLS-EU-Q16, for use in a Swedish context: A study protocol

Josefin Wångdahl<sup>1,2</sup>, Karuna Dahlberg<sup>3</sup>, Maria Jaensson<sup>3</sup>, Ulrica Nilsson<sup>2,4</sup>

1. Department of Public Health and Caring Sciences, Uppsala University, Uppsala, Sweden.
2. Department of Neurobiology, Care Sciences, and Society, Karolinska Institute.
3. School of Health Sciences, Faculty of Medicine and Health, Örebro University, Örebro, Sweden.
4. Department of Perioperative Medicine and Intensive Care, Karolinska University Hospital, Stockholm, Sweden

### Corresponding author:

Ulrica Nilsson

Division of Nursing

Department of Neurobiology, Care Sciences and Society

Karolinska Institute

Alfred Nobels Allé 23, C3

141 83 Huddinge, Sweden

Phone +46 8-524 838 22

Fax +46 08-524 868 09

e-mail: [ulrica.nilsson@ki.se](mailto:ulrica.nilsson@ki.se)

**Keywords:** Migrants; eHealth; literacy: psychometric evaluation; Arabic; Swedish

**Word Count:** 3714

## ABSTRACT

### Introduction

Equity in health and access to health care regardless of, gender, ethnicity or social position is a major political issue worldwide. Regardless of an individual's knowledge, motivation, and competence individuals are expected to be engaged and take responsibility of their own care. Migrants have been identified as a vulnerable population in health care and an explanation for the inequity in health, and in health care is limited health literacy. Further more, with increasing digitalization in health care, it puts demand on the individual to also have digital or electronic health (eHealth) literacy.

The overall aim of this study is to conduct a psychometric evaluation of the Swedish and Arabic versions of HLS-EU-Q16 and eHEALS, and to compare Arabic and Swedish speakers' Health literacy and eHealth literacy levels in Sweden.

### Methods and Analysis

This is a prospective, psychometric evaluation study with the intent of including 300 Arabic speaking and 300 Swedish speaking participants. Questionnaires: The Health Literacy Survey European Questionnaire (HLS-EU-Q16) including 16 items measuring perceived personal skills of finding, understanding, judging, and applying health information to maintain and improve their health. The eHealth literacy scale (eHEALS), an 8-item measuring health literacy skills in relation to online information and applications.

This study will be conducted in four phases. Phase 1: Translation of HLS-EU-Q16 and eHEALS from English to Swedish and Arabic following the principles of translation of questionnaires. Phase 2: Content validity testing of eHEALS, including face validity and interpretability conducted with five Arabic and five Swedish speaking participants. Phase 3: Psychometric testing including construct validity, reliability, feasibility and floor ceiling effects. Phase 4: Distribution and comparison of eHealth and HLS-EU-Q16 analysed with Chi square and Fisher's exact test as appropriate. To assess associations between HLS-EU-Q16, eHEALS and demographic variables binary logistic regression analyses will be performed.

## **Ethics and dissemination**

The project has been approved by the regional ethical review board in Stockholm, Sweden (2019/5:1) and will follow the principles outlined in the 1964 Helsinki Declaration and its later amendments. Results from this study will be disseminated in peer-reviewed journals, scientific conferences and in social media.

## **ARTICLE SUMMARY**

### **Strengths and limitations**

- A Swedish and Arabic version of eHEALS and HLS-EU-Q16 have not yet been psychometric evaluated
- eHealth literacy has not previously been investigated in a Swedish population.
- This is the first study to compare eHealth literacy between Swedish and Arabic speaking citizens in Sweden.
- Although this study includes both Swedish and Arabic speaking participants from different contexts in the society the study is conducted in Sweden and may not be generalizable to other contexts.

## INTRODUCTION

### *The importance of health literacy*

Patients in today's health care system are expected to take part and be engaged in their own care. Consequently, they have to be able to read and understand health instructions on how to manage their own recovery at home <sup>1</sup>. Informed decision making requires people to have a certain level of health literacy. In this article we use the following definition of comprehensive health literacy:

Health literacy is linked to literacy and entails people's knowledge, motivation, and competence to access, understand, appraise, and apply health information in order to make judgments and take decisions in everyday life concerning healthcare, disease prevention and health promotion to maintain or improve quality of life during the life course<sup>2</sup>.

Health literacy is regarded as a social determinant of health <sup>3</sup> and has a strong social gradient <sup>4</sup>. Which means, health literacy can be an additional barrier to health for already disadvantaged and marginalised groups within societies. Limited health literacy is likely to affect patients' quality of care, resulting in lower satisfaction with care and lower understanding of their medical situation <sup>5</sup> and their safety, by decreasing the probability of an adverse medication due to misunderstanding instructions <sup>5,6</sup>. Health literacy is also associated with the extent to which people benefit from health examinations <sup>7</sup> and the quality of their postoperative recovery <sup>8</sup>.

With increasing digitalisation of information and services, modern health care and health promotion have become increasingly challenging for both patients and health care staff<sup>9</sup>. This demands a range of digital competencies among users, and requires new ways to describe and evaluate users' digital capabilities and experiences in this rapidly changing health context <sup>9</sup>. Consequently, the concept of digital or electronic health (eHealth) literacy has emerged <sup>10-12</sup> and been described as 'the ability to seek, find, understand, and appraise health information from electronic sources and apply the knowledge gained to addressing or solving a health problem' <sup>12</sup>.

1  
2  
3 Equity in health and access to health care regardless of social position, gender, race, or  
4 ethnicity is a major political issue in the European Region and worldwide <sup>13</sup>. The Swedish  
5 Health and Medical Services Act <sup>14</sup> states that the goal of health care is to promote ‘good  
6 health and care on equal terms for the entire population’ <sup>6, 14</sup>. Migrants, whether they are  
7 labour migrants or refugees, have been identified as a vulnerable population, but there is  
8 heterogeneity in the degree to which they are vulnerable to inadequate health care <sup>5, 6, 15, 16</sup>.  
9  
10 One explanatory factor for the inequity in health, and in health care is limited health literacy  
11 on individual and organizational level <sup>17</sup>. A Swedish study show for example that newly  
12 arrived refugees with limited health literacy, to a higher degree experienced poor quality of  
13 communication and benefited less from the health examination for asylum seekers than those  
14 with higher health literacy <sup>7</sup>. Another study show that newly arrived refugees with limited  
15 comprehensive health literacy have poorer general health and do not seek needed care as often  
16 as those with higher comprehensive health literacy <sup>18</sup>.

### 27 *HLS-EU-Q16*

28  
29 In 2011-2012, Sørensen et al. developed the Health Literacy Survey European Questionnaire,  
30 HLS-EUQ47, a self-reporting instrument consisting of 47 items <sup>19</sup>. The instrument is based on  
31 a systematic literature review that derived an all-inclusive conceptual model and the definition  
32 of comprehensive health literacy used in this study. In 2013, the instrument was used in a  
33 large study including populations in 8 European countries <sup>4</sup>. As a result of that study’s  
34 analysis, the shorter 16-item version, HLS-EU-Q16, was developed <sup>2</sup>. Both the HLS-EUQ47  
35 and HLS-EU-Q16 have been used frequently in many different countries and are available in  
36 a range of languages

37  
38  
39  
40  
41  
42 2, 18, 20-22.

43  
44  
45  
46 The HLS-EU-Q16 aims to measure respondents’ perceived personal skills of finding,  
47 understanding, judging, and applying health information to maintain and improve their health  
48 <sup>19</sup>. Each item in the instrument is answered on a 4-point Likert scale with response options  
49 ranging from ‘very difficult’ to ‘very easy’. An overall HLS-EU-Q16 index will be calculated  
50 in three steps according to the developer <sup>23</sup>. First, the response categories for the 16 items will  
51 be dichotomized into easy (fairly easy and easy) giving the value of 1, and difficult (difficult  
52 and very difficult) giving the value 0. Second, an overall sum score will be calculated. Third,  
53 sum scores will be divided into three categories: inadequate (0-8 score points), problematic  
54 (9-12 score points) and sufficient (13-16 score points) health literacy. HLS-EUQ16 has been  
55  
56  
57  
58  
59  
60

1  
2  
3 psychometrically tested and showed to be in some migrant populations in which it was found  
4 to be reliable and valid <sup>24</sup>.  
5  
6  
7

8 The Arabic and Swedish versions of HLS-EU-Q16 have been translated in line with  
9 guidelines for the translation of instruments and tested for Face validity among migrants in  
10 Sweden <sup>25</sup>. The Swedish and Arabic versions of the HLS-EU-Q16 have since been used in  
11 several studies in Sweden <sup>7, 18, 26</sup> and Egypt <sup>20</sup>. However, the translated Swedish and Arabic  
12 versions have not yet been tested for other aspects of validity and comprehensive health  
13 literacy has not been compared between Swedish- and non-Swedish-speaking people.  
14  
15  
16  
17  
18  
19

### 20 *eHEALS*

21 In 2006, Norman and Skinner developed the eHealth literacy scale, eHEALS. It aims to  
22 measure a broad range of literacy skills, which might make it useful in assessing the effects of  
23 strategies to deliver online information and applications. eHEALS is an 8-item instrument  
24 with each item scored on a 5-point Likert scale with response options ranging from ‘strongly  
25 agree’ to ‘strongly disagree’. Total scores on the eHEALS range from 8 to 40, with higher  
26 scores representing higher self-perceived eHealth literacy.  
27  
28  
29  
30  
31  
32  
33

34 The eHEALS is available in a range of languages <sup>11, 12, 27-31 32-34</sup> and the English version has  
35 been successfully administered digitally via telephone <sup>35</sup>. Tests of the validity of eHEALS  
36 indicates that it is a reliable and valid instrument<sup>12, 28, 36-38</sup> but also that the validity of if it  
37 requires further investigation <sup>11</sup>. However, the eHEALS has not been tested for validity  
38 among the general Swedish- or Arabic-speaking population in Sweden. eHealth literacy has  
39 not been examined in Sweden nor compared between Swedish- and non-Swedish-speaking  
40 people.  
41  
42  
43  
44  
45  
46  
47

### 48 **Aim**

49  
50  
51 The overall aim of this study is to psychometric evaluate the Swedish and Arabic versions of  
52 HLS-EU-Q16 and eHEALS, and to compare Arabic and Swedish speakers’ Health literacy  
53 and eHealth literacy levels in Sweden.  
54  
55  
56  
57  
58  
59  
60

## METHODS AND ANALYSIS

### Study design

This is a prospective, psychometric and comparative evaluation divided into four different phases (Figure 1). Study recruitment will start in February 2019 and is planned to end in June 2019.

### Phase 1: Translation process

The original English version of eHEALS will be translated into Swedish and Arabic. Arabic was selected as it is the most common native language spoken among refugees in Sweden<sup>39</sup>. One independent translator each with either Swedish or Arabic as their native language will translate the English version of eHEALS to Swedish and Arabic. These translations should use plain language and be comprehensible to a 12-year-old speaker of the target language<sup>40</sup>. Although it is important that the content of the items remain the same as in the original version, the wording or word order in the translated versions should be appropriate to the target language and understandable by speakers with various levels of education.

A translator group will consist of four professional translators, one for the forward translation into each of Swedish and Arabic and one for backward translations from each language. The translators will be recruited from translator associations found and through personal contacts. Previous experience in translating survey questions within the health domain will be a criterion for recruitment as a translator.

A committee to examine the quality of the translations will be recruited on the basis of criteria recommended for committees used in cross-cultural adaption projects<sup>41</sup>. The committee will consist of 12 members: 8 bilingual in English and Swedish and 4 multilingual in English, Arabic, and Swedish. The bilingual members should have experience in plain language and health literacy and/or health communication. Multilingual members should have experiences from data collections with Arabic speaking participants within the public health domain and previous experience of reviewing translated instruments.

The translation into Swedish will be completed first and reviewed by the researchers, who will compare it with the original English version, examine how well it fits the Swedish

1  
2  
3 context, and check it for plain language. If necessary, adjustments will be made and the new  
4 versions discussed with the bilingual members in the committee to ensure that the content of  
5 the English and Swedish versions is the same and that plain language is used. The new  
6 versions will also be discussed with four Swedish-speaking lay-people of different ages,  
7 genders, and education levels to ensure the items are understandable. When the researchers  
8 are satisfied with the Swedish version, based on the feedback from the bilingual and lay-  
9 people, it will be back-translated into English and the researchers and the translator will  
10 compare it with the English original version. If the back-translation does not match the  
11 original eHEALS, the Swedish version will be adjusted and back-translated again as many  
12 times as necessary to obtain a back-translation consistent with the original English version.  
13  
14  
15  
16  
17  
18  
19  
20  
21

22 Once the Swedish version is finalized, the translated Arabic version will be reviewed by the  
23 four multilingual members in the committee, who together with the researchers, will discuss  
24 how well the translated version fits the Swedish context, to what extent plain language has  
25 been used, and how well the content of the translated version matches both the English  
26 original and the final Swedish versions. If necessary, adjustments will be made and the new  
27 versions discussed again with the multilingual members. When all are satisfied with the  
28 translated version, it will be back-translated into English by one independent translator and  
29 compared with the English original version by one of the multilingual members. If the back-  
30 translation does not match the English original version, it will be adjusted and back-translated  
31 again as many times as necessary to obtain a back-translation consistent with the original  
32 English version.  
33  
34  
35  
36  
37  
38  
39  
40  
41  
42

## **Phase 2: content validity testing of the Arabic and Swedish version of eHEALS**

### **Content validity**

43  
44  
45  
46 Content validity is the degree to which the content of an instrument is an adequate reflection  
47 of the construct it is meant to measure<sup>42</sup>. As the plan is to use the instruments in this study in  
48 the general population, i.e. in study populations they have been used previously in, no greater  
49 adaptations of the instruments are needed. Examination of the content of the instrument by an  
50 expert committees will therefore not be conducted. However, the face validity – the degree to  
51 which the items or the instrument as a whole appear to adequately reflect the construct to be  
52 measured<sup>42</sup> – and the interpretability of the items<sup>40</sup> will be examined.  
53  
54  
55  
56  
57  
58  
59  
60



1  
2  
3 The face validity of the final Swedish and Arabic versions will be tested through qualitative  
4 interviews with five people in each language group to check whether these people understand  
5 the items as intended. Participants will be recruited purposively and through snowball  
6 sampling <sup>43</sup> either directly by the researchers or through the researchers' personal contacts  
7 with key people in groups speaking Arabic. A mix of different ages, genders, and educational  
8 levels will be sought. Information about the project and the meaning of informed consent will  
9 be given orally and in writing to the participants. If the person agrees to attend, the time for  
10 the interview will be booked.  
11  
12

13  
14  
15 In the interview, participants will be asked 'What were you thinking of while you were  
16 answering that question?' and if necessary, 'Why did you select that response?' Interviews  
17 will be audio recorded and notes written by the interviewer into templates containing the two  
18 predetermined questions. Participants will also be asked about their age, gender, highest level  
19 of education, and years living in Sweden.  
20  
21

22  
23 The five Swedish-speaking participants will be interviewed by two of the researchers and the  
24 five Arabic-speaking participants by a research assistant with Arabic as native language, who  
25 will take notes in Swedish. Each interviewer will listen to the recorded audio files,  
26 complemented by the notes (if any) written immediately after each interview. The researchers,  
27 will then read all notes separately.  
28  
29

30  
31 If the analysis shows that any items are difficult to understand and major changes to either  
32 translation are needed, the items concerned will be revised and tested again on five new  
33 participants. This procedure will be repeated until all items are easy to understand.  
34  
35  
36

### 37 38 39 40 41 42 43 44 45 **Phase 3: Psychometric testing of the Arabic and Swedish version of eHEALS and HLS-** 46 **EU-Q16** 47

#### 48 49 50 **Participants**

51  
52 Two different language groups will be recruited from different regions in Sweden to test the  
53 translated instruments. The intention is to include one group of participants representative of  
54 the general Swedish-born population (n = 300) and one group representative of Swedish  
55 residents born in an Arabic-speaking country (n = 300). The chosen sample size was first  
56 guided by the 10:1 ratio <sup>40</sup>: 16 items on the HLS-EU-Q16 × 10 = 160 participants. However, a  
57  
58  
59  
60

1  
2  
3 general rule of thumb for factor analysis is 300 cases or the more lenient 50 participants per  
4 factor <sup>44</sup>. HLS-EU-Q16 consists of only one factor <sup>19</sup>, therefore a sample size of 300  
5  
6 participants is considered most appropriate. Inclusion criteria for participation will be being  
7  
8 an adult ( $\geq 18$  years), having sufficient language skills to read, understand, and fill in a form in  
9  
10 their native language (Swedish or Arabic), and being available on the days of data collection.  
11  
12 Arabic speakers born outside of Sweden shall also have a Swedish resident's permit.  
13

14  
15 Participants will be recruited from university courses, municipal adult education courses  
16  
17 (Komvux), larger workplaces with both academic and non-academic staff, non-governmental  
18  
19 organisations serving elderly people, migrant associations, courses in civic orientation, and  
20  
21 supplementary academic courses for nurses with degrees from countries outside of Europe.  
22  
23 These arenas are chosen because they attract many Swedish residents of different ages,  
24  
25 genders, and levels of education who speak Swedish or Arabic as their first language. A mix  
26  
27 of ages, genders, and educational levels will be sought in both groups. Upon recruitment of  
28  
29 the participants, organizations manager or responsible person conducting group activities with  
30  
31 potential study participants will be contacted and informed about the project.  
32

33  
34 On the day of the data collection, a researcher will visit the various arenas to inform people  
35  
36 both orally and in writing about the project and the meaning of informed consent. In groups  
37  
38 with Arabic-speaking people, the Arabic-speaking research assistant will provide the oral and  
39  
40 written information about the project and the meaning of informed consent in the potential  
41  
42 participants' native language. People who agree to participate will be given a questionnaire  
43  
44 and asked to fill it in directly onsite. By filling in the questionnaire, they also consent to take  
45  
46 part in the study.  
47

48  
49 The following questionnaires and study specific questions will be distributed in Swedish and  
50  
51 Arabic respectively depending on native language.

- 52 - the eHEALS instrument (8 items) assessing eHealth literacy;
- 53 - the HLS-EU-Q16 instrument (16 items) assessing comprehensive health literacy;
- 54 - one question about general self-perceived health;
- 55 - one question about use of internet and,
- 56 - descriptive background questions (age, gender, highest level of education, country of  
57  
58 birth).
- 59 - -number of years lived in Sweden. (Arabic-speaking group only).  
60

1  
2  
3  
4  
5 The questionnaire used in the Arabic-speaking group includes the same components, plus one  
6 question about their number of years lived in Sweden.  
7  
8

9  
10 General self-perceived health will be measured by the questions ‘How do you assess your  
11 overall health status?’ Response options are Very poor, Poor, Fair, Good, and Very good.<sup>7, 45</sup>  
12 Internet use will be measured by the question ‘How often do you use the internet?’ Response  
13 options are Almost every day, Several days a week, About 1 day a week, Less than 1 day a  
14 week, and Almost never<sup>11</sup>.  
15  
16  
17  
18  
19

### 20 21 **Psychometric testing**

22 The psychometric testing will be guided by CONsensus-based Standards for the selection of  
23 health Measurement INstruments (COSMIN)<sup>40, 42, 46</sup>  
24  
25  
26

### 27 28 **Construct validity**

29 The construct validity<sup>42</sup> focus on evaluating tests of the hypotheses. This aspect of construct  
30 validity can be described as the degree to which the scores of an instrument are consistent  
31 with a hypothesis<sup>42</sup>. The participants and questionnaire for collecting data, will be the same  
32 as those described above.  
33  
34  
35  
36  
37

38 Based on previous studies on health literacy showing positive associations between limited  
39 health literacy and high age<sup>4, 47-49</sup>, low education level<sup>20, 49, 50</sup>, poor health<sup>7, 8, 22, 48, 51</sup> and  
40 between eHEALS and low use of the Internet<sup>11</sup>, several hypotheses will be used regarding  
41 correlations between HLS-EU-Q16/eHEALS and; age, level of education, self-perceived  
42 general health and quantity of Internet use. Moreover, hypothesis regarding correlations  
43 between eHEALS and; HLS-EU-Q16 and certain HLS-EU-Q16 items will be used. All  
44 hypothesis are presented in Figure 2.  
45  
46  
47  
48  
49  
50

51 Spearman’s rank order correlation between total mean scores on eHEALS and HLS-EU-Q16,  
52 self-perceived health, level of education, and age will be used to A coefficient magnitude of  
53  $>0.4$  will be considered evidence of construct validity (i.e., moderate to strong correlations)<sup>46</sup>.  
54  
55  
56  
57  
58  
59  
60

## Reliability

Reliability can be used as a term for a domain and as a term for a measurement property<sup>42</sup>. In this study we are analyse two aspects of reliability: internal consistency and test-retest reliability.

### Internal consistency

Internal consistency describes the interrelatedness among items<sup>42</sup> and will be analysed for both eHEALS and HLS-EU-Q16.

- Exploratory factor analysis will be used to identify the underlying relationships between items on eHEALS and HLS-EU-Q16<sup>40</sup>.
- Cronbach's alpha will be calculated for each instrument to assess the average correlation of items within each scale. Cronbach's alpha in the range of 0.7–0.95 will be considered acceptable<sup>40, 52</sup>.
- Split-half reliability will be used to measure the correlation between random split segments and to determine how much error in a test score is due to poor test construction<sup>52</sup>. A Spearman-Brown coefficient of 0.70–0.90 will be considered acceptable<sup>53, 54</sup>.

### Test-retest reliability

Test-retest reliability can be described as the extent to which scores for the same patients are the same in measurements repeated over time<sup>42</sup>. Intraclass correlation coefficient (ICC) will be used and an ICC value of  $\geq 0.7$  will be considered acceptable<sup>40</sup>. Because the sample size needed for test-retest is much smaller than for testing many other forms of validity, the sample size in the retest of 25 people per language category (total 50) is considered appropriate<sup>55</sup>.

Participants in the test-retest groups will be invited to take part in the retest when they are recruited to participate in the main test. To minimise dropouts, participants in the test-retest groups will be recruited in the pre-existing groups having regular, at least weekly, meetings. A mix of different ages, genders, and education levels will be sought. To compare answers from the test and the retest, the participants will mark their questionnaires with their birth date or any other self-contained code if they do not wish to give their date of birth. If they use their

own code, they will be asked to write it down in a list of codes the researcher will bring to the second measurement in case they forget their code.

### **Feasibility**

The feasibility of the clinical user-friendliness of the instruments will be assessed by their successful response rate <sup>46</sup>.

### **Floor and ceiling effects**

Floor and ceiling effects (the number of respondents who achieve the lowest or highest possible scores<sup>40</sup> will be examined. Floor or ceiling effects are considered a problem if more than 15% of a study population achieve the lowest or highest possible score<sup>40</sup>.

### **Phase 4. Distribution of eHEALS and HLS-EU-Q16 levels in the study population and comparisons of levels in the two language groups**

The distribution of eHEALS and HLS-EU-Q16 levels in the study population as a whole and within each language group will be examined. Chi-square tests – or Fisher’s exact tests as appropriate – will be used to test for differences in eHEALS and HLS-EU-Q16 between language groups. Binary logistic regression analyses will be performed to assess associations between HLS-EU-Q16 and eHEALS as dependent variables, and age, education level, gender, country of birth, general self-perceived health, and internet use as independent variables.

All data will be analysed using SPSS version 24.0 for Windows (IBM Corporation, Somers, NY, USA). Two-tailed *P* values under .05 will be considered significant.

### **Patient and Public Involvement**

No public involvement

### **Discussion**

A considerable proportion of both the European population and newly arrived refugees in Sweden have limited comprehensive health literacy <sup>4</sup>. How this is distributed in the general Swedish population and the eHealth literacy levels of Swedish- and Arabic-speaking people

1  
2  
3 living in Sweden are rather unknown. Knowledge about comprehensive health literacy (and  
4 by extension, eHealth literacy) is important, though, as it is associated with people's health  
5 status<sup>17</sup>, use of health information and health care services<sup>5, 6, 33, 47, 56</sup>. Being regarded as an  
6 important social determinant of health<sup>3</sup> and having a social gradient health literacy<sup>4</sup> in  
7 patients is important to consider in work to promote health, disease prevention, and health  
8 care, in order to secure that people with various levels of health literacy benefit equally from  
9 health efforts to reduce the risk of promote inequity in health and healthcare instead of vice  
10 versa<sup>17</sup>. However, in Sweden validated instruments to measure comprehensive health literacy  
11 and eHealth literacy of Swedish-, and Arabic-speaking people are lacking, i.e. needs to be  
12 developed.

13  
14  
15 Our research team has developed and tested a digital monitoring system, Recovery  
16 Assessment by Phone Points (RAPP), that enables day surgery patients to contact health care  
17 easily and to report from home about how they feel<sup>57</sup>. It has been tested in studies with  
18 Swedish-speaking patients, and proved to be cost-effective<sup>58</sup>, to help patients feel safer and  
19 less bothered by symptoms, such as pain, nausea, anxiety, in their postoperative recovery<sup>57</sup>,  
20  
21  
22  
23  
24  
25  
26  
27  
28  
29  
30  
31  
32  
33  
34  
35  
36  
37  
38  
39  
40  
41  
42  
43  
44  
45  
46  
47  
48  
49  
50  
51  
52  
53  
54  
55  
56  
57  
58  
59  
60  
Strong relationships between postoperative recovery, health, and mental health were also  
found. However, so far RAPP is only available to Swedish-speaking patients. Next step is to  
develop RAPP for non-Swedish-speakers, starting with Arabic, and to compare postoperative  
recovery and unplanned medical contacts between non-Swedish-speaking Arabic patients and  
Swedish-speaking patients. We will then also study differences in eHealth literacy, mental  
health, and postoperative recovery between the groups, and describe their experiences of  
postoperative recovery and using a digital tracking system such as RAPP. However, before  
we can investigate these questions, we need to develop valid Arabic and Swedish version of  
eHEALS to be able to assess eHealth literacy.

### **Ethics and dissemination**

The project has been approved by the regional ethical review board in Stockholm, Sweden  
(number 2019/5:1) and will follow the principles outlined in the 1964 Helsinki Declaration  
and its later amendments. Participants will receive written and verbal information about the  
study, including the purpose and procedures, the voluntary nature of participation, and their  
option to withdraw at any time. They will also be guaranteed confidentiality and secure data  
storage.

1  
2  
3  
4  
5 This is an open-access article distributed under the terms of the Creative Commons  
6 Attribution Non-commercial License, which permits use, distribution, and reproduction in any  
7 medium, provided the original work is properly cited, and the use is non-commercial and  
8 otherwise in compliance with the license. See: <http://creativecommons.org/licenses/by-nc/2.0/> and <http://creativecommons.org/licenses/by-nc/2.0/legalcode>.  
9  
10  
11  
12  
13  
14

### 15 **Authors' contributions**

16 JW have contributed to the planning of the study, study design, the preparation of the  
17 manuscript and approved of the final version.

18 KD have contributed to the planning of the study, study design, the preparation of the  
19 manuscript and approved of the final version.

20 MJ have contributed to the planning of the study, study design, the preparation of the  
21 manuscript and approved of the final version.

22 UN have contributed to the planning of the study, study design, the preparation of the  
23 manuscript, led the calculation of sample size and approved of the final version.  
24  
25  
26  
27  
28  
29  
30  
31

### 32 **Funding statement**

33 This research received no specific grant from any funding agency in the public, commercial or  
34 not-for-profit sectors  
35  
36  
37  
38

### 39 **Competing interests**

40 None  
41  
42  
43

### 44 **No figure legend**

45  
46  
47 Figure 1. Overview of the research process.

48  
49 Figure 2. Hypothesis of correlations between eHEALS/HLS-EU-Q16 and various variables.  
50  
51  
52  
53  
54  
55  
56  
57  
58  
59  
60

## References

1. Koster E, Schmidt A, Philbert D, van de Garde E, Bouvy M. Health literacy of patients admitted for elective surgery. *Journal of Public Health* 2017;25(2):181-6.
2. Sørensen K, Van den Broucke S, Fullam J, Doyle G, Pelikan J, Slonska Z, et al. Health literacy and public health: a systematic review and integration of definitions and models. *BMC Public Health*. 2012;12(1):80.
3. Kickbusch IS. Health literacy: addressing the health and education divide. *Health Promot Int*. 2001;16(3):289-97.
4. Sørensen K, Pelikan JM, Röthlin F, Ganahl K, Slonska Z, Doyle G, et al. Health literacy in Europe: comparative results of the European health literacy survey (HLS-EU). *Eur J Public Health*. 2015;25(6):1053-8.
5. Kirmayer LJ, Narasiah L, Munoz M, Rashid M, Ryder AG, Guzder J, et al. Common mental health problems in immigrants and refugees: general approach in primary care. *Can Med Assoc J*. 2011;183(12):E959-E67.
6. Sundquist J. Migration, equality and access to health care services. BMJ Publishing Group Ltd; 2001. p. 691-2.
7. Wångdahl J, Lytsy P, Mårtensson L, Westerling R. Health literacy and refugees' experiences of the health examination for asylum seekers—a Swedish cross-sectional study. *BMC Public Health*. 2015;15(1):1162.
8. Hälleberg-Nyman M, Nilsson U, Dahlberg K, Jaensson M. The association between functional health literacy and postoperative recovery, healthcare contacts and health related quality of life among patients undergoing day surgery. *JAMA Surgery*. 2018;153(8):1-8.
9. Kayser L, Karnoe A, Furstrand D, Batterham R, Christensen KB, Elsworth G, et al. A multidimensional tool based on the eHealth literacy framework: development and initial validity testing of the eHealth literacy questionnaire (eHLQ). *J Med Internet Res*. 2018;20(2):e36.
10. Norgaard O, Furstrand D, Klokke L, Karnoe A, Batterham R, Kayser L, et al. The e-health literacy framework: a conceptual framework for characterizing e-health users and their interaction with e-health systems. *J Med Internet Res*. 2015;7(4):522-40.
11. Van der Vaart R, van Deursen AJ, Drossaert CH, Taal E, van Dijk JA, van de Laar MA. Does the eHealth Literacy Scale (eHEALS) measure what it intends to measure? Validation of a Dutch version of the eHEALS in two adult populations. *J Med Internet Res*. 2011;13(4).
12. Norman CD, Skinner HA. eHEALS: the eHealth literacy scale. *J Med Internet Res*. 2006;8(4).
13. Cf OdDS. Transforming our world: The 2030 agenda for sustainable development. <https://sustainabledevelopment.un.org/post2015/transformingourworld>: 2015 Contract No.: 31-01-2019.
14. sjukvårdslag H-o. Svensk författningssamling 2017:30. Stockholm, Sweden: Socialdepartementet 2017:13.
15. Wiking E, Johansson S-E, Sundquist J. Ethnicity, acculturation, and self reported health. A population based study among immigrants from Poland, Turkey, and Iran in Sweden. *J Epidemiol Community Health*. 2004;58(7):574-82.
16. Derose KP, Escarce JJ, Lurie N. Immigrants and health care: sources of vulnerability. *Health Aff (Millwood)*. 2007;26(5):1258-68.
17. Wångdahl J. Health literacy among newly arrived refugees in Sweden and implications for health and healthcare: *Acta Universitatis Upsaliensis*; 2017.
18. Wångdahl J, Lytsy P, Mårtensson L, Westerling R. Poor health and refraining from seeking healthcare are associated with comprehensive health literacy among refugees: a Swedish cross-sectional study. *International Journal of Public Health*. 2018;63(3):409-19.
19. Sørensen K, Van den Broucke S, Pelikan JM, Fullam J, Doyle G, Slonska Z, et al. Measuring health literacy in populations: illuminating the design and development process of the European Health Literacy Survey Questionnaire (HLS-EU-Q). *BMC Public Health*. 2013;13(1):948.



20. Almaleh R, Helmy Y, Farhat E, Hasan H, Abdelhafez A. Assessment of health literacy among outpatient clinics attendees at Ain Shams University Hospitals, Egypt: a cross-sectional study. *Public Health*. 2017;151:137-45.
21. Gele AA, Pettersen KS, Torheim LE, Kumar B. Health literacy: the missing link in improving the health of Somali immigrant women in Oslo. *BMC Public Health*. 2016;16(1):1134.
22. Levin-Zamir D, Baron-Epel OB, Cohen V, Elhayany A. The association of health literacy with health behavior, socioeconomic indicators, and self-assessed health from a national adult survey in Israel. *Journal of health communication*. 2016;21(sup2):61-8.
23. Pelikan J, Röthlin F, Canahl K. Introduction to HL measurement procedures of the HLS-EU study, . 2nd European HL Conference; Aarhus2014.
24. Emiral G, Aygar H, Isiktekin B, Göktas S, Dagtekin G, Arslantas D, et al. Health literacy scale-European union-Q16: a validity and reliability study in Turkey. *International Research Journal of Medical Sciences*. 2018;6(1):1-7.
25. Wångdahl JM, Mårtensson L. The Communicative and Critical health literacy scale–Swedish version. *Scandinavian journal of public health*. 2014;42(1):25-31.
26. Wångdahl J, Lytsy P, Mårtensson L, Westerling R. Health literacy among refugees in Sweden—a cross-sectional study. *BMC Public Health*. 2014;14(1):1030.
27. Paige SR, Krieger JL, Stelfefon M, Alber JM, counseling. eHealth literacy in chronic disease patients: an item response theory analysis of the eHealth literacy scale (eHEALS). *Patient Educ Couns*. 2017;100(2):320-6.
28. Paramio GP, Almagro B, Hernando ÁG, Aguaded JG. Validation of the eHealth literacy scale (eHEALS) in Spanish university students. *Rev Esp Salud Publica*. 2015;89(3):329-38.
29. Mitsutake S, Shibata A, Ishii K, Okazaki K, Oka K. Developing Japanese version of the eHealth literacy scale (eHEALS). *Japanese journal of public health*. 2011;58(5):361-71.
30. Soellner R, Huber S, Reder M. The concept of eHealth literacy and its measurement. *Journal of Media Psychology*. 2014.
31. Efthymiou A, Middleton N, Charalambous A, Papastavrou E. The Association of Health Literacy and Electronic Health Literacy With Self-Efficacy, Coping, and Caregiving Perceptions Among Carers of People With Dementia: Research Protocol for a Descriptive Correlational Study. *JMIR research protocols*. 2017;6(11):e224.
32. Diviani N, Dima AL, Schulz PJ. A psychometric analysis of the Italian version of the eHealth literacy scale using item response and classical test theory methods. *J Med Internet Res*. 2017;19(4):e114.
33. Cardoso Tomás C, Pina Queirós PJ, Rodrigues Ferreira TdJ. Analysis of the psychometric properties of the portuguese version of an eHealth literacy assessment tool. *Revista de Enfermagem Referência*. 2014;4(2):19-28.
34. Chang A, Schulz P. The Measurements and an Elaborated Understanding of Chinese eHealth Literacy (C-eHEALS) in Chronic Patients in China. *International journal of environmental research*. 2018;15(7):1553.
35. Stelfefon M, Paige SR, Tennant B, Alber JM, Chaney BH, Chaney D, et al. Reliability and Validity of the Telephone-Based eHealth Literacy Scale Among Older Adults: Cross-Sectional Survey. *J Med Internet Res*. 2017;19(10).
36. Nguyen G, Gambashidze N, Ilyas SA, Pascu D. Validation of the safety attitudes questionnaire (short form 2006) in Italian in hospitals in the northeast of Italy. *BMC Health Serv Res*. 2015;15(1):284.
37. Richtering SS, Morris R, Soh S-E, Barker A, Bampi F, Neubeck L, et al. Examination of an eHealth literacy scale and a health literacy scale in a population with moderate to high cardiovascular risk: Rasch analyses. *PLoS One*. 2017;12(4):e0175372.
38. Koo M, Norman CD, Hsiao-Mei C. Psychometric evaluation of a Chinese version of the eHealth literacy scale (eHEALS) in school age children. *Global Journal of Health Education*. 2012;15(1).

- 1
- 2
- 3 39. Statistiska c. Utländska medborgare i riket efter medborgarskapsland, ålder och kön.
- 4 År 1973 - 2017. [https://www.scb.se/hitta-statistik/statistik-efter-amne/befolkning/befolkningens-](https://www.scb.se/hitta-statistik/statistik-efter-amne/befolkning/befolkningens-sammansattning/befolkningsstatistik/)
- 5 [sammansattning/befolkningsstatistik/](https://www.scb.se/hitta-statistik/statistik-efter-amne/befolkning/befolkningens-sammansattning/befolkningsstatistik/): Statistiska, centralbyrån; 2018 [cited 2018 12 October].
- 6 40. Terwee CB, Bot SD, de Boer MR, van der Windt DA, Knol DL, Dekker J, et al. Quality
- 7 criteria were proposed for measurement properties of health status questionnaires. *J Clin Epidemiol.*
- 8 2007;60(1):34-42.
- 9 41. Guillemin F, Bombardier C, Beaton D. Cross-cultural adaptation of health-related
- 10 quality of life measures: literature review and proposed guidelines. *J Clin Epidemiol.*
- 11 1993;46(12):1417-32.
- 12 42. Mokkink LB, Terwee CB, Patrick DL, Alonso J, Stratford PW, Knol DL, et al. The COSMIN
- 13 study reached international consensus on taxonomy, terminology, and definitions of measurement
- 14 properties for health-related patient-reported outcomes. *Journal of clinical epidemiology.*
- 15 2010;63(7):737-45.
- 16 43. Valerio MA, Rodriguez N, Winkler P, Lopez J, Dennison M, Liang Y, et al. Comparing
- 17 two sampling methods to engage hard-to-reach communities in research priority setting. *BMC Med*
- 18 *Res Methodol.* 2016;16(1):146.
- 19 44. VanVoorhis CW, Morgan BL. Understanding power and rules of thumb for determining
- 20 sample sizes. *Tutorials in Quantitative Methods for Psychology.* 2007;3(2):43-50.
- 21 45. Nielsen SS, Krasnik A. Poorer self-perceived health among migrants and ethnic
- 22 minorities versus the majority population in Europe: a systematic review. *International journal of*
- 23 *public health.* 2010;55(5):357-71.
- 24 46. De Vet HC, Terwee CB, Mokkink LB, Knol DL. *Measurement in medicine: a practical*
- 25 *guide.* Cambridge: Cambridge University Press; 2011.
- 26 47. Berkman ND, Sheridan SL, Donahue KE, Halpern DJ, Crotty K. Low health literacy and
- 27 health outcomes: an updated systematic review. *Ann Intern Med.* 2011;155(2):97-107.
- 28 48. Palumbo R, Annarumma C, Adinolfi P, Musella M, Piscopo G. The Italian Health
- 29 Literacy Project: Insights from the assessment of health literacy skills in Italy. *Health Policy.*
- 30 2016;120(9):1087-94.
- 31 49. Paasche-Orlow MK, Parker RM, Gazmararian JA, Nielsen-Bohlman LT, Rudd RR. The
- 32 prevalence of limited health literacy. *J Gen Intern Med.* 2005;20(2):175-84.
- 33 50. Ng E, Omariba DWR. Immigration, generational status and health literacy in Canada.
- 34 *Health Educ J.* 2014;73(6):668-82.
- 35 51. Easton P, Entwistle VA, Williams B. Health in the 'hidden population' of people with low
- 36 literacy. A systematic review of the literature. *BMC Public Health.* 2010;10(1):459.
- 37 52. Cronbach LJ. Coefficient alpha and the internal structure of tests. *Psychometrika.*
- 38 1951;16(3):297-334.
- 39 53. McDowell I. *Measuring health: a guide to rating scales and questionnaires:* Oxford
- 40 University Press, USA; 2006.
- 41 54. de Vet HC, Mokkink LB, Mosmuller DG, Terwee CB. Spearman–Brown prophecy
- 42 formula and Cronbach's alpha: different faces of reliability and opportunities for new applications.
- 43 *Journal of clinical epidemiology.* 2017;85:45-9.
- 44 55. Bujang MA, Baharum N. A simplified guide to determination of sample size
- 45 requirements for estimating the value of intraclass correlation coefficient: A review. *Archives of*
- 46 *Orofacial Science.* 2017;12(1).
- 47 56. Rasu RS, Bawa WA, Suminski R, Snella K, Warady B, management. Health literacy
- 48 impact on national healthcare utilization and expenditure. *International journal of health policy.*
- 49 2015;4(11):747.
- 50 57. Jaensson M, Dahlberg K, Eriksson M, Nilsson U. Evaluation of postoperative recovery in
- 51 day surgery patients using a mobile phone application: a multicentre randomized trial. *Br J Anaesth.*
- 52 2017;119(5):1030-8.
- 53
- 54
- 55
- 56
- 57
- 58
- 59
- 60

- 1  
2  
3 58. Dahlberg K, Philipsson A, Hagberg L, Jaensson M, Hälleberg-Nyman M, Nilsson U. Cost-  
4 effectiveness of a systematic e-assessed follow-up of postoperative recovery after day surgery: a  
5 multicentre randomized trial. *Br J Anaesth*. 2017;119(5):1039-46.  
6  
7 59. Dahlberg K, Jaensson M, Nilsson U, Eriksson M, Odenchants S. Holding It Together—A  
8 Qualitative Study of Patients' Perspectives on Postoperative Recovery When Using an e-Assessed  
9 Follow-Up. *JMIR Mhealth Uhealth* 2018;6(5):e10387. 2018;6(5):e10387.  
10  
11  
12  
13  
14  
15  
16  
17  
18  
19  
20  
21  
22  
23  
24  
25  
26  
27  
28  
29  
30  
31  
32  
33  
34  
35  
36  
37  
38  
39  
40  
41  
42  
43  
44  
45  
46  
47  
48  
49  
50  
51  
52  
53  
54  
55  
56  
57  
58  
59  
60

For peer review only

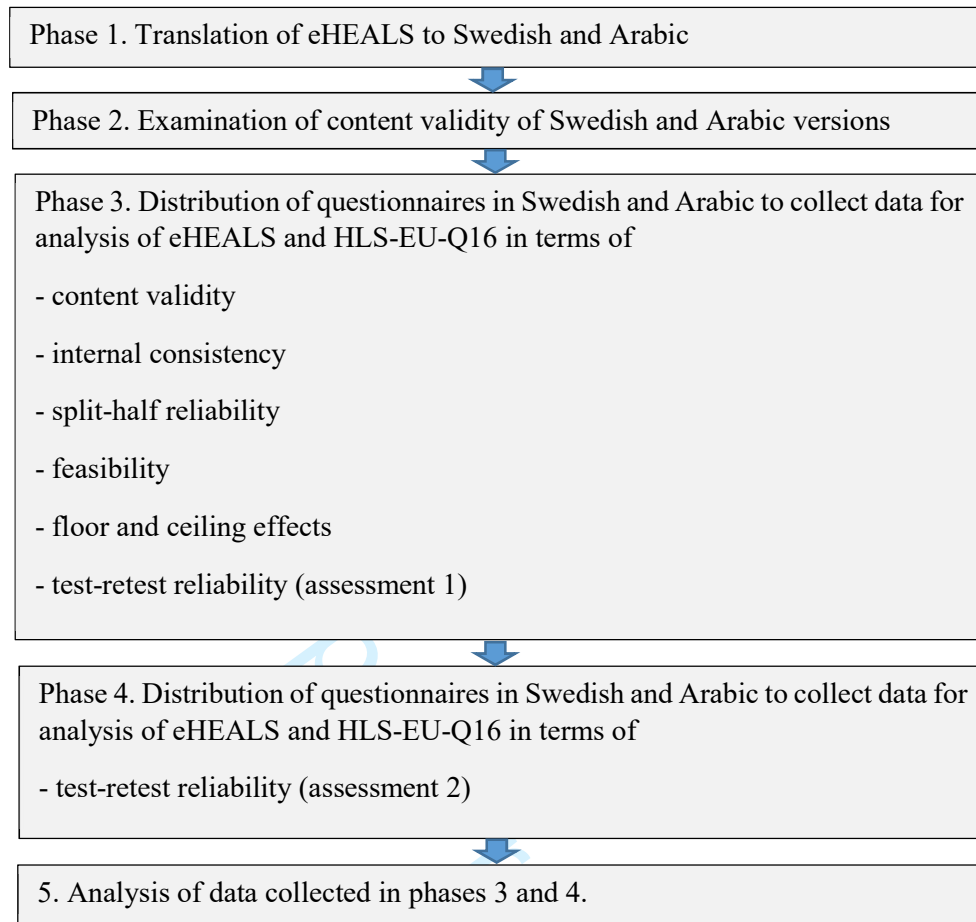

Figure 1. Overview of the research process.

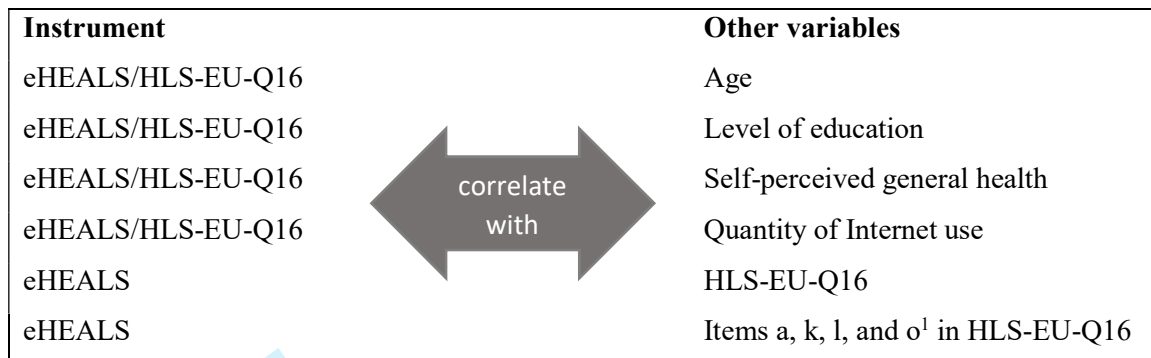

Figure 2. Hypothesis of correlations between eHEALS/HLS-EU-Q16 and various variables.

<sup>1</sup> Item a: How easy/difficult is it for you to find information on treatments of illnesses that concern you?

Item k: How easy/difficult is it for you to judge whether information on health risks in the media (e.g., on television or the internet) is reliable?

Item l: How easy/difficult is it for you to decide how you can protect yourself from illness based on information in media (e.g., in newspapers or leaflets or on the internet)?

Item o: How easy/difficult is it for you to understand information in the media (e.g., from the internet or daily or weekly magazines) on how improve your health?

# BMJ Open

## Psychometric validation of Swedish and Arabic versions of two Health literacy questionnaires, eHEALS and HLS-EU-Q16, for use in a Swedish context: A study protocol

|                                 |                                                                                                                                                                                                                                                                                                                                                                                                                                                                                                                                                                                                                                                          |
|---------------------------------|----------------------------------------------------------------------------------------------------------------------------------------------------------------------------------------------------------------------------------------------------------------------------------------------------------------------------------------------------------------------------------------------------------------------------------------------------------------------------------------------------------------------------------------------------------------------------------------------------------------------------------------------------------|
| Journal:                        | <i>BMJ Open</i>                                                                                                                                                                                                                                                                                                                                                                                                                                                                                                                                                                                                                                          |
| Manuscript ID                   | bmjopen-2019-029668.R2                                                                                                                                                                                                                                                                                                                                                                                                                                                                                                                                                                                                                                   |
| Article Type:                   | Protocol                                                                                                                                                                                                                                                                                                                                                                                                                                                                                                                                                                                                                                                 |
| Date Submitted by the Author:   | 23-Jun-2019                                                                                                                                                                                                                                                                                                                                                                                                                                                                                                                                                                                                                                              |
| Complete List of Authors:       | Wangdahl, Josefin M.; Uppsala Univ, Department of Public Health and Caring Sciences; Karolinska Institutet, Department of Neurobiology, Care Sciences and Society, Karolinska Institutet<br>Dahlberg, Karuna; Örebro University, Sweden, Faculty of Health and Medical Sciences, School of Health and Medical Sciences<br>Jaensson, Maria; Örebro University, Sweden, Faculty of Health and Medical Sciences, School of Health and Medical Sciences<br>Nilsson, Ulrica; Karolinska Institutet, Department of Neurobiology, Care Sciences and Society, Karolinska Institutet; Karolinska Universitetssjukhuset, Perioperative Medicine and Intensive Care |
| <b>Primary Subject Heading</b>: | Research methods                                                                                                                                                                                                                                                                                                                                                                                                                                                                                                                                                                                                                                         |
| Secondary Subject Heading:      | Health informatics                                                                                                                                                                                                                                                                                                                                                                                                                                                                                                                                                                                                                                       |
| Keywords:                       | health literacy, psychmetric evaluation, eHealth                                                                                                                                                                                                                                                                                                                                                                                                                                                                                                                                                                                                         |
|                                 |                                                                                                                                                                                                                                                                                                                                                                                                                                                                                                                                                                                                                                                          |

SCHOLARONE™  
Manuscripts

1  
2  
3  
4  
5  
6  
7  
8  
9  
10  
11  
12  
13  
14  
15  
16  
17  
18  
19  
20  
21  
22  
23  
24  
25  
26  
27  
28  
29  
30  
31  
32  
33  
34  
35  
36  
37  
38  
39  
40  
41  
42  
43  
44  
45  
46  
47  
48  
49  
50  
51  
52  
53  
54  
55  
56  
57  
58  
59  
60

## Psychometric validation of Swedish and Arabic versions of two Health literacy questionnaires, eHEALS and HLS-EU-Q16, for use in a Swedish context: A study protocol

Josefin Wångdahl<sup>1,2</sup>, Karuna Dahlberg<sup>3</sup>, Maria Jaensson<sup>3</sup>, Ulrica Nilsson<sup>2,4</sup>

1. Department of Public Health and Caring Sciences, Uppsala University, Uppsala, Sweden.
2. Department of Neurobiology, Care Sciences, and Society, Karolinska Institute.
3. School of Health Sciences, Faculty of Medicine and Health, Örebro University, Örebro, Sweden.
4. Department of Perioperative Medicine and Intensive Care, Karolinska University Hospital, Stockholm, Sweden

### Corresponding author:

Ulrica Nilsson

Division of Nursing

Department of Neurobiology, Care Sciences and Society

Karolinska Institute

Alfred Nobels Allé 23, C3

141 83 Huddinge, Sweden

Phone +46 8-524 838 22

Fax +46 08-524 868 09

e-mail: [ulrica.nilsson@ki.se](mailto:ulrica.nilsson@ki.se)

**Keywords:** Migrants; eHealth; literacy: psychometric evaluation; Arabic; Swedish

**Word Count:** 3714

## ABSTRACT

### Introduction

Equity in health and access to health care regardless of, gender, ethnicity or social position is a major political issue worldwide. Regardless of an individual's knowledge, motivation, and competence individuals are expected to be engaged and take responsibility of their own care. Migrants have been identified as a vulnerable population in health care and an explanation for the inequity in health, and in health care is limited health literacy. Further more, with increasing digitalization in health care, it puts demand on the individual to also have digital or electronic health (eHealth) literacy.

The overall aim of this study is to conduct a psychometric evaluation of the Swedish and Arabic versions of HLS-EU-Q16 and eHEALS, and to compare Arabic and Swedish speakers' Health literacy and eHealth literacy levels in Sweden.

### Methods and Analysis

This is a prospective, psychometric evaluation study with the intent of including 300 Arabic speaking and 300 Swedish speaking participants. Questionnaires: The Health Literacy Survey European Questionnaire (HLS-EU-Q16) including 16 items measuring perceived personal skills of finding, understanding, judging, and applying health information to maintain and improve their health. The eHealth literacy scale (eHEALS), an 8-item measuring health literacy skills in relation to online information and applications.

This study will be conducted in four phases. Phase 1: Translation of HLS-EU-Q16 and eHEALS from English to Swedish and Arabic following the principles of translation of questionnaires. Phase 2: Content validity testing of eHEALS, including face validity and interpretability conducted with five Arabic and five Swedish speaking participants. Phase 3: Psychometric testing including construct validity, reliability, feasibility and floor ceiling effects. Phase 4: Distribution and comparison of eHealth and HLS-EU-Q16 analysed with Chi square and Fisher's exact test as appropriate. To assess associations between HLS-EU-Q16, eHEALS and demographic variables binary logistic regression analyses will be performed.



## Ethics and dissemination

The project has been approved by the regional ethical review board in Stockholm, Sweden (2019/5:1) and will follow the principles outlined in the 1964 Helsinki Declaration and its later amendments. Results from this study will be disseminated in peer-reviewed journals, scientific conferences and in social media.

## ARTICLE SUMMARY

### Strengths and limitations

- A Swedish and Arabic version of eHEALS and HLS-EU-Q16 have not yet been psychometric evaluated
- eHealth literacy has not previously been investigated in a Swedish population.
- This is the first study to compare eHealth literacy between Swedish and Arabic speaking citizens in Sweden.
- Although this study includes both Swedish and Arabic speaking participants from different contexts in the society the study is conducted in Sweden and may not be generalizable to other contexts.

## INTRODUCTION

### *The importance of health literacy*

Patients in today's health care system are expected to take part and be engaged in their own care. Consequently, they have to be able to read and understand health instructions on how to manage their own recovery at home <sup>1</sup>. As such, a patient's health literacy also influences their ability to take part in informed decision-making. In this article we use a comprehensive definition of health literacy:

Health literacy is linked to literacy and entails people's knowledge, motivation, and competence to access, understand, appraise, and apply health information in order to make judgments and take decisions in everyday life concerning healthcare, disease prevention and health promotion to maintain or improve quality of life during the life course<sup>2</sup>.

Health literacy is regarded as a social determinant of health <sup>3</sup> and has a strong social gradient <sup>4</sup>. Which means, health literacy can be an additional barrier to health for already disadvantaged and marginalised groups within societies. Limited health literacy is likely to affect patients' quality of care, resulting in lower satisfaction with care and lower understanding of their medical situation <sup>5</sup> and their safety, by decreasing the probability of an adverse medication due to misunderstanding instructions <sup>5,6</sup>. Health literacy is also associated with the extent to which people benefit from health examinations <sup>7</sup> and the quality of their postoperative recovery <sup>8</sup>.

With increasing digitalisation of information and services, modern health care and health promotion have become increasingly challenging for both patients and health care staff <sup>9</sup>. This demands a range of digital competencies among users, and requires new ways to describe and evaluate users' digital capabilities and experiences in this rapidly changing health context <sup>9</sup>. Consequently, the concept of digital or electronic health (eHealth) literacy has emerged <sup>10-12</sup> and been described as 'the ability to seek, find, understand, and appraise health information from electronic sources and apply the knowledge gained to addressing or solving a health problem' <sup>12</sup>.

1  
2  
3 Equity in health and access to health care regardless of social position, gender, race, or  
4 ethnicity is a major political issue in the European Region and worldwide <sup>13</sup>. The Swedish  
5 Health and Medical Services Act <sup>14</sup> states that the goal of health care is to promote ‘good  
6 health and care on equal terms for the entire population’ <sup>6, 14</sup>. Migrants, whether they are  
7 labour migrants or refugees, have been identified as a vulnerable population, but there is  
8 heterogeneity in the degree to which they are vulnerable to inadequate health care <sup>5, 6, 15, 16</sup>.  
9  
10 One explanatory factor for the inequity in health, and in health care is limited health literacy  
11 on individual and organizational level <sup>17</sup>. A Swedish study show for example that newly  
12 arrived refugees with limited health literacy, to a higher degree experienced poor quality of  
13 communication and benefited less from the health examination for asylum seekers than those  
14 with higher health literacy <sup>7</sup>. Another study show that newly arrived refugees with limited  
15 comprehensive health literacy have poorer general health and do not seek needed care as often  
16 as those with higher comprehensive health literacy <sup>18</sup>.

### 27 *HLS-EU-Q16*

28  
29 In 2011-2012, Sørensen et al. developed the Health Literacy Survey European Questionnaire,  
30 HLS-EUQ47, a self-reporting instrument consisting of 47 items <sup>19</sup>. The instrument is based on  
31 a systematic literature review that derived an all-inclusive conceptual model and the definition  
32 of comprehensive health literacy used in this study. In 2013, the instrument was used in a  
33 large study including populations in 8 European countries <sup>4</sup>. As a result of that study’s  
34 analysis, the shorter 16-item version, HLS-EU-Q16, was developed <sup>2</sup>. Both the HLS-EUQ47  
35 and HLS-EU-Q16 have been used frequently in many different countries and are available in  
36 a range of languages

37  
38  
39  
40  
41  
42 2, 18, 20-22.

43  
44  
45  
46 The HLS-EU-Q16 aims to measure respondents’ perceived personal skills of finding,  
47 understanding, judging, and applying health information to maintain and improve their health  
48 <sup>19</sup>. Each item in the instrument is answered on a 4-point Likert scale with response options  
49 ranging from ‘very difficult’ to ‘very easy’. An overall HLS-EU-Q16 index will be calculated  
50 in three steps according to the developer <sup>23</sup>. First, the response categories for the 16 items will  
51 be dichotomized into easy (fairly easy and easy) giving the value of 1, and difficult (difficult  
52 and very difficult) giving the value 0. Second, an overall sum score will be calculated. Third,  
53 sum scores will be divided into three categories: inadequate (0-8 score points), problematic  
54 (9-12 score points) and sufficient (13-16 score points) health literacy. HLS-EUQ16 has been  
55  
56  
57  
58  
59  
60

1  
2  
3 psychometrically tested and showed to be in some migrant populations in which it was found  
4 to be reliable and valid <sup>24</sup>.  
5  
6  
7

8 The Arabic and Swedish versions of HLS-EU-Q16 have been translated in line with  
9 guidelines for the translation of instruments and tested for Face validity among migrants in  
10 Sweden <sup>25</sup>. The Swedish and Arabic versions of the HLS-EU-Q16 have since been used in  
11 several studies in Sweden <sup>7, 18, 26</sup> and Egypt <sup>20</sup>. However, the translated Swedish and Arabic  
12 versions have not yet been tested for other aspects of validity and comprehensive health  
13 literacy has not been compared between Swedish- and non-Swedish-speaking people.  
14  
15  
16  
17  
18  
19

### 20 *eHEALS*

21 In 2006, Norman and Skinner developed the eHealth literacy scale, eHEALS. It aims to  
22 measure a broad range of literacy skills, which might make it useful in assessing the effects of  
23 strategies to deliver online information and applications. eHEALS is an 8-item instrument  
24 with each item scored on a 5-point Likert scale with response options ranging from ‘strongly  
25 agree’ to ‘strongly disagree’. Total scores on the eHEALS range from 8 to 40, with higher  
26 scores representing higher self-perceived eHealth literacy.  
27  
28  
29  
30  
31  
32  
33

34 The eHEALS is available in a range of languages <sup>11, 12, 27-31 32-34</sup> and the English version has  
35 been successfully administered digitally via telephone <sup>35</sup>. Tests of the validity of eHEALS  
36 indicates that it is a reliable and valid instrument<sup>12, 28, 36-38</sup> but also that the validity of if it  
37 requires further investigation <sup>11</sup>. However, the eHEALS has not been tested for validity  
38 among the general Swedish- or Arabic-speaking population in Sweden. eHealth literacy has  
39 not been examined in Sweden nor compared between Swedish- and non-Swedish-speaking  
40 people.  
41  
42  
43  
44  
45  
46  
47

### 48 **Aim**

49  
50  
51 The overall aim of this study is to psychometric evaluate the Swedish and Arabic versions of  
52 HLS-EU-Q16 and eHEALS, and to compare Arabic and Swedish speakers’ Health literacy  
53 and eHealth literacy levels in Sweden.  
54  
55  
56  
57  
58  
59  
60

## METHODS AND ANALYSIS

### Study design

This is a prospective, psychometric and comparative evaluation divided into four different phases (Figure 1). Study recruitment will start in February 2019 and is planned to end in June 2019.

### Phase 1: Translation process

The original English version of eHEALS will be translated into Swedish and Arabic. Arabic was selected as it is the most common native language spoken among refugees in Sweden<sup>39</sup>. One independent translator each with either Swedish or Arabic as their native language will translate the English version of eHEALS to Swedish and Arabic. These translations should use plain language and be comprehensible to a 12-year-old speaker of the target language<sup>40</sup>. Although it is important that the content of the items remain the same as in the original version, the wording or word order in the translated versions should be appropriate to the target language and understandable by speakers with various levels of education.

A translator group will consist of four professional translators, one for the forward translation into each of Swedish and Arabic and one for backward translations from each language. The translators will be recruited from translator associations found and through personal contacts. Previous experience in translating survey questions within the health domain will be a criterion for recruitment as a translator.

A committee to examine the quality of the translations will be recruited on the basis of criteria recommended for committees used in cross-cultural adaption projects<sup>41</sup>. The committee will consist of 12 members: 8 bilingual in English and Swedish and 4 multilingual in English, Arabic, and Swedish. The bilingual members should have experience in plain language and health literacy and/or health communication. Multilingual members should have experiences from data collections with Arabic speaking participants within the public health domain and previous experience of reviewing translated instruments.

The translation into Swedish will be completed first and reviewed by the researchers, who will compare it with the original English version, examine how well it fits the Swedish

1  
2  
3 context, and check it for plain language. If necessary, adjustments will be made and the new  
4 versions discussed with the bilingual members in the committee to ensure that the content of  
5 the English and Swedish versions is the same and that plain language is used. The new  
6 versions will also be discussed with four Swedish-speaking lay-people of different ages,  
7 genders, and education levels to ensure the items are understandable. When the researchers  
8 are satisfied with the Swedish version, based on the feedback from the bilingual and lay-  
9 people, it will be back translated into English and the researchers and the translator will  
10 compare it with the English original version. If the back-translation does not match the  
11 original eHEALS, the Swedish version will be adjusted and back translated again as many  
12 times as necessary to obtain a back-translation consistent with the original English version.  
13  
14  
15  
16  
17  
18  
19  
20  
21

22 Once the Swedish version is finalized, the translated Arabic version will be reviewed by the  
23 four multilingual members in the committee, who together with the researchers, will discuss  
24 how well the translated version fits the Swedish context, to what extent plain language has  
25 been used, and how well the content of the translated version matches both the English  
26 original and the final Swedish versions. If necessary, adjustments will be made and the new  
27 versions discussed again with the multilingual members. When all are satisfied with the  
28 translated version, it will be back translated into English by one independent translator and  
29 compared with the English original version by one of the multilingual members. If the back-  
30 translation does not match the English original version, it will be adjusted and back translated  
31 again as many times as necessary to obtain a back-translation consistent with the original  
32 English version.  
33  
34  
35  
36  
37  
38  
39  
40  
41  
42

## **Phase 2: content validity testing of the Arabic and Swedish version of eHEALS**

### **Content validity**

43  
44  
45  
46  
47  
48 Content validity is the degree to which the content of an instrument is an adequate reflection  
49 of the construct it is meant to measure<sup>42</sup>. As the plan is to use the instruments in this study in  
50 the general population, i.e. in study populations they have been used previously in, no greater  
51 adaptations of the instruments are needed. Examination of the content of the instrument by an  
52 expert committee will therefore not be conducted. However, the face validity – the degree to  
53 which the items or the instrument as a whole appear to adequately reflect the construct to be  
54 measured<sup>42</sup> – and the interpretability of the items<sup>40</sup> will be examined.  
55  
56  
57  
58  
59  
60

1  
2  
3 The face validity of the final Swedish and Arabic versions will be tested through qualitative  
4 interviews with five people in each language group to check whether these people understand  
5 the items as intended. Participants will be recruited purposively and through snowball  
6 sampling <sup>43</sup> either directly by the researchers or through the researchers' personal contacts  
7 with key people in groups speaking Arabic. A mix of different ages, genders, and educational  
8 levels will be sought. Information about the project and the meaning of informed consent will  
9 be given orally and in writing to the participants. If the person agrees to attend, the time for  
10 the interview will be booked.  
11  
12

13  
14  
15 In the interview, participants will be asked 'What were you thinking of while you were  
16 answering that question?' and if necessary, 'Why did you select that response?' Interviews  
17 will be audio recorded and notes written by the interviewer into templates containing the two  
18 predetermined questions. Participants will also be asked about their age, gender, highest level  
19 of education, and years living in Sweden.  
20  
21

22  
23 The five Swedish-speaking participants will be interviewed by two of the researchers and the  
24 five Arabic-speaking participants by a research assistant with Arabic as native language, who  
25 will take notes in Swedish. Each interviewer will listen to the recorded audio files,  
26 complemented by the notes (if any) written immediately after each interview. The researchers,  
27 will then read all notes separately.  
28  
29

30  
31 If the analysis shows that any items are difficult to understand and major changes to either  
32 translation are needed, the items concerned will be revised and tested again on five new  
33 participants. This procedure will be repeated until all items are easy to understand.  
34  
35  
36

### 37 38 39 40 41 42 43 44 45 **Phase 3: Psychometric testing of the Arabic and Swedish version of eHEALS and HLS-** 46 **EU-Q16** 47

#### 48 49 50 **Participants**

51  
52 Two different language groups will be recruited from different regions in Sweden to test the  
53 translated instruments. The intention is to include one group of participants representative of  
54 the general Swedish-born population (n = 300) and one group representative of Swedish  
55 residents born in an Arabic-speaking country (n = 300). The chosen sample size was first  
56 guided by the 10:1 ratio <sup>40</sup>: 16 items on the HLS-EU-Q16  $\times$  10 = 160 participants. However, a  
57  
58  
59  
60

1  
2  
3 general rule of thumb for factor analysis is 300 cases or the more lenient 50 participants per  
4 factor <sup>44</sup>. HLS-EU-Q16 consists of only one factor <sup>19</sup>, therefore a sample size of 300  
5  
6 participants is considered most appropriate. Inclusion criteria for participation will be being  
7  
8 an adult ( $\geq 18$  years), having sufficient language skills to read, understand, and fill in a form in  
9  
10 their native language (Swedish or Arabic), and being available on the days of data collection.  
11  
12 Arabic speakers born outside of Sweden shall also have a Swedish resident's permit.  
13

14  
15 Participants will be recruited from university courses, municipal adult education courses  
16  
17 (Komvux), larger workplaces with both academic and non-academic staff, non-governmental  
18  
19 organisations serving elderly people, migrant associations, courses in civic orientation, and  
20  
21 supplementary academic courses for nurses with degrees from countries outside of Europe.  
22  
23 These arenas are chosen because they attract many Swedish residents of different ages,  
24  
25 genders, and levels of education who speak Swedish or Arabic as their first language. A mix  
26  
27 of ages, genders, and educational levels will be sought in both groups. Upon recruitment of  
28  
29 the participants, organizations manager or responsible person conducting group activities with  
30  
31 potential study participants will be contacted and informed about the project.  
32

33  
34 On the day of the data collection, a researcher will visit the various arenas to inform people  
35  
36 both orally and in writing about the project and the meaning of informed consent. In groups  
37  
38 with Arabic-speaking people, the Arabic-speaking research assistant will provide the oral and  
39  
40 written information about the project and the meaning of informed consent in the potential  
41  
42 participants' native language. People who agree to participate will be given a questionnaire  
43  
44 and asked to fill it in directly onsite. By filling in the questionnaire, they also consent to take  
45  
46 part in the study.  
47

48  
49 The following questionnaires and study specific questions will be distributed in Swedish and  
50  
51 Arabic respectively depending on native language.  
52

- 53 - the eHEALS instrument (8 items) assessing eHealth literacy;
- 54 - the HLS-EU-Q16 instrument (16 items) assessing comprehensive health literacy;
- 55 - one question about general self-perceived health;
- 56 - one question about use of internet and,
- 57 - descriptive background questions (age, gender, highest level of education, country of  
58 birth).
- 59 - -number of years lived in Sweden. (Arabic-speaking group only).  
60



1  
2  
3  
4  
5 The questionnaire used in the Arabic-speaking group includes the same components, plus one  
6 question about their number of years lived in Sweden.  
7  
8  
9

10 General self-perceived health will be measured by the questions ‘How do you assess your  
11 overall health status?’ Response options are Very poor, Poor, Fair, Good, and Very good.<sup>7, 45</sup>  
12 Internet use will be measured by the question ‘How often do you use the internet?’ Response  
13 options are Almost every day, Several days a week, About 1 day a week, Less than 1 day a  
14 week, and Almost never<sup>11</sup>.  
15  
16  
17  
18  
19  
20

### 21 **Psychometric testing**

22 The psychometric testing will be guided by CONsensus-based Standards for the selection of  
23 health Measurement INstruments (COSMIN)<sup>40, 42, 46</sup>  
24  
25  
26  
27

### 28 **Construct validity**

29 The construct validity<sup>42</sup> focus on evaluating tests of the hypotheses. This aspect of construct  
30 validity can be described as the degree to which the scores of an instrument are consistent  
31 with a hypothesis<sup>42</sup>. The participants and questionnaire for collecting data, will be the same  
32 as those described above.  
33  
34  
35  
36  
37

38 Based on previous studies on health literacy showing positive associations between limited  
39 health literacy and high age<sup>4, 47-49</sup>, low education level<sup>20, 49, 50</sup>, poor health<sup>7, 8, 22, 48, 51</sup> and  
40 between eHEALS and low use of the Internet<sup>11</sup>, several hypotheses will be used regarding  
41 correlations between HLS-EU-Q16/eHEALS and; age, level of education, self-perceived  
42 general health and quantity of Internet use. Moreover, hypothesis regarding correlations  
43 between eHEALS and; HLS-EU-Q16 and certain HLS-EU-Q16 items will be used. All  
44 hypothesis are presented in Figure 2.  
45  
46  
47  
48  
49  
50

51 Spearman’s rank order correlation between total mean scores on eHEALS and HLS-EU-Q16,  
52 self-perceived health, level of education, and age will be used to A coefficient magnitude of  
53  $>0.4$  will be considered evidence of construct validity (i.e., moderate to strong correlations)<sup>46</sup>.  
54  
55  
56  
57  
58  
59  
60

## Reliability

Reliability can be used as a term for a domain and as a term for a measurement property<sup>42</sup>. In this study we are analyse two aspects of reliability: internal consistency and test-retest reliability.

### Internal consistency

Internal consistency describes the interrelatedness among items<sup>42</sup> and will be analysed for both eHEALS and HLS-EU-Q16.

- Exploratory factor analysis will be used to identify the underlying relationships between items on eHEALS and HLS-EU-Q16<sup>40</sup>.
- Cronbach's alpha will be calculated for each instrument to assess the average correlation of items within each scale. Cronbach's alpha in the range of 0.7–0.95 will be considered acceptable<sup>40, 52</sup>.
- Split-half reliability will be used to measure the correlation between random split segments and to determine how much error in a test score is due to poor test construction<sup>52</sup>. A Spearman-Brown coefficient of 0.70–0.90 will be considered acceptable<sup>53, 54</sup>.

### Test-retest reliability

Test-retest reliability can be described as the extent to which scores for the same patients are the same in measurements repeated over time<sup>42</sup>. Intraclass correlation coefficient (ICC) will be used and an ICC value of  $\geq 0.7$  will be considered acceptable<sup>40</sup>. Because the sample size needed for test-retest is much smaller than for testing many other forms of validity, the sample size in the retest of 25 people per language category (total 50) is considered appropriate<sup>55</sup>.

Participants in the test-retest groups will be invited to take part in the retest when they are recruited to participate in the main test. To minimise dropouts, participants in the test-retest groups will be recruited in the pre-existing groups having regular, at least weekly, meetings. A mix of different ages, genders, and education levels will be sought. To compare answers from the test and the retest, the participants will mark their questionnaires with their birth date or any other self-contained code if they do not wish to give their date of birth. If they use their

own code, they will be asked to write it down in a list of codes the researcher will bring to the second measurement in case they forget their code.

### **Feasibility**

The feasibility of the clinical user-friendliness of the instruments will be assessed by their successful response rate<sup>46</sup>.

### **Floor and ceiling effects**

Floor and ceiling effects (the number of respondents who achieve the lowest or highest possible scores<sup>40</sup> will be examined. Floor or ceiling effects are considered a problem if more than 15% of a study population achieve the lowest or highest possible score<sup>40</sup>.

### **Phase 4. Distribution of eHEALS and HLS-EU-Q16 levels in the study population and comparisons of levels in the two language groups**

The distribution of eHEALS and HLS-EU-Q16 levels in the study population as a whole and within each language group will be examined. Chi-square tests – or Fisher’s exact tests as appropriate – will be used to test for differences in eHEALS and HLS-EU-Q16 between language groups. Binary logistic regression analyses will be performed to assess associations. We hypothesise that there will be positive correlations between HLS-EU-Q16/eHEALS and level of education, self-perceived general health and quantity of Internet use; and negative correlations between HLS-EU-Q16/eHEALS and age. Moreover, we hypothesise positive correlations between eHEALS, HLS-EU-Q16 and certain HLS-EU-Q16 items (Figure 2).

All data will be analysed using SPSS version 24.0 for Windows (IBM Corporation, Somers, NY, USA). Two-tailed *P* values under .05 will be considered significant.

### **Patient and Public Involvement**

No public involvement

### **Discussion**

1  
2  
3 A considerable proportion of both the European population and newly arrived refugees in  
4 Sweden have limited comprehensive health literacy<sup>4</sup>. How this is distributed in the general  
5 Swedish population and the eHealth literacy levels of Swedish- and Arabic-speaking people  
6 living in Sweden are rather unknown. Knowledge about comprehensive health literacy (and  
7 by extension, eHealth literacy) is important, though, as it is associated with people's health  
8 status<sup>17</sup>, use of health information and health care services<sup>5, 6, 33, 47, 56</sup>. Being regarded as an  
9 important social determinant of health<sup>3</sup> and having a social gradient health literacy<sup>4</sup> in  
10 patients is important to consider in work to promote health, disease prevention, and health  
11 care, in order to secure that people with various levels of health literacy benefit equally from  
12 health efforts to reduce the risk of promote inequity in health and healthcare instead of vice  
13 versa<sup>17</sup>. However, in Sweden validated instruments to measure comprehensive health literacy  
14 and eHealth literacy of Swedish-, and Arabic-speaking people are lacking, i.e. needs to be  
15 developed.

16  
17  
18  
19  
20  
21  
22  
23  
24  
25  
26  
27 Our research team has developed and tested a digital monitoring system, Recovery  
28 Assessment by Phone Points (RAPP), that enables day surgery patients to contact health care  
29 easily and to report from home about how they feel<sup>57</sup>. It has been tested in studies with  
30 Swedish-speaking patients, and proved to be cost-effective<sup>58</sup>, to help patients feel safer and  
31 less bothered by symptoms, such as pain, nausea, anxiety, in their postoperative recovery<sup>57</sup>,  
32  
33  
34  
35  
36  
37  
38  
39  
40  
41  
42  
43  
44  
45  
46  
47  
48  
49  
50  
51  
52  
53  
54  
55  
56  
57  
58  
59  
60  
59. Strong relationships between postoperative recovery, health, and mental health were also  
found. However, so far RAPP is only available to Swedish-speaking patients. Next step is to  
develop RAPP for non-Swedish-speakers, starting with Arabic, and to compare postoperative  
recovery and unplanned medical contacts between non-Swedish-speaking Arabic patients and  
Swedish-speaking patients. We will then also study differences in eHealth literacy, mental  
health, and postoperative recovery between the groups, and describe their experiences of  
postoperative recovery and using a digital tracking system such as RAPP. However, before  
we can investigate these questions, we need to develop valid Arabic and Swedish version of  
eHEALS to be able to assess eHealth literacy.

### **Ethics and dissemination**

The project has been approved by the regional ethical review board in Stockholm, Sweden  
(number 2019/5:1) and will follow the principles outlined in the 1964 Helsinki Declaration  
and its later amendments. Participants will receive written and verbal information about the

1  
2  
3 study, including the purpose and procedures, the voluntary nature of participation, and their  
4 option to withdraw at any time. They will also be guaranteed confidentiality and secure data  
5 storage.  
6  
7  
8  
9

10 This is an open-access article distributed under the terms of the Creative Commons  
11 Attribution Non-commercial License, which permits use, distribution, and reproduction in any  
12 medium, provided the original work is properly cited, and the use is non-commercial and  
13 otherwise in compliance with the license. See: <http://creativecommons.org/licenses/by-nc/2.0/> and <http://creativecommons.org/licenses/by-nc/2.0/legalcode>.  
14  
15  
16  
17  
18  
19

### 20 **Authors' contributions**

21 JW have contributed to the planning of the study, study design, the preparation of the  
22 manuscript and approved of the final version.  
23

24 KD have contributed to the planning of the study, study design, the preparation of the  
25 manuscript and approved of the final version.  
26  
27

28 MJ have contributed to the planning of the study, study design, the preparation of the  
29 manuscript and approved of the final version.  
30  
31

32 UN have contributed to the planning of the study, study design, the preparation of the  
33 manuscript, led the calculation of sample size and approved of the final version.  
34  
35  
36

### 37 **Funding statement**

38 This research received no specific grant from any funding agency in the public, commercial or  
39 not-for-profit sectors  
40  
41  
42  
43

### 44 **Competing interests**

45 None  
46  
47  
48  
49

### 50 **No figure legend**

51 Figure 1. Overview of the research process.  
52

53 Figure 2. Hypothesis of correlations between eHEALS/HLS-EU-Q16 and various variables.  
54  
55  
56  
57  
58  
59  
60

## References

1. Koster E, Schmidt A, Philbert D, van de Garde E, Bouvy M. Health literacy of patients admitted for elective surgery. *Journal of Public Health* 2017;25(2):181-6.
2. Sørensen K, Van den Broucke S, Fullam J, Doyle G, Pelikan J, Slonska Z, et al. Health literacy and public health: a systematic review and integration of definitions and models. *BMC Public Health*. 2012;12(1):80.
3. Kickbusch IS. Health literacy: addressing the health and education divide. *Health Promot Int*. 2001;16(3):289-97.
4. Sørensen K, Pelikan JM, Röthlin F, Ganahl K, Slonska Z, Doyle G, et al. Health literacy in Europe: comparative results of the European health literacy survey (HLS-EU). *Eur J Public Health*. 2015;25(6):1053-8.
5. Kirmayer LJ, Narasiah L, Munoz M, Rashid M, Ryder AG, Guzder J, et al. Common mental health problems in immigrants and refugees: general approach in primary care. *Can Med Assoc J*. 2011;183(12):E959-E67.
6. Sundquist J. Migration, equality and access to health care services. BMJ Publishing Group Ltd; 2001. p. 691-2.
7. Wångdahl J, Lytsy P, Mårtensson L, Westerling R. Health literacy and refugees' experiences of the health examination for asylum seekers—a Swedish cross-sectional study. *BMC Public Health*. 2015;15(1):1162.
8. Hälleberg-Nyman M, Nilsson U, Dahlberg K, Jaensson M. The association between functional health literacy and postoperative recovery, healthcare contacts and health related quality of life among patients undergoing day surgery. *JAMA Surgery*. 2018;153(8):1-8.
9. Kayser L, Karnoe A, Furstrand D, Batterham R, Christensen KB, Elsworth G, et al. A multidimensional tool based on the eHealth literacy framework: development and initial validity testing of the eHealth literacy questionnaire (eHLQ). *J Med Internet Res*. 2018;20(2):e36.
10. Norgaard O, Furstrand D, Klokke L, Karnoe A, Batterham R, Kayser L, et al. The e-health literacy framework: a conceptual framework for characterizing e-health users and their interaction with e-health systems. *J Med Internet Res*. 2015;7(4):522-40.
11. Van der Vaart R, van Deursen AJ, Drossaert CH, Taal E, van Dijk JA, van de Laar MA. Does the eHealth Literacy Scale (eHEALS) measure what it intends to measure? Validation of a Dutch version of the eHEALS in two adult populations. *J Med Internet Res*. 2011;13(4).
12. Norman CD, Skinner HA. eHEALS: the eHealth literacy scale. *J Med Internet Res*. 2006;8(4).
13. Cf OdDS. Transforming our world: The 2030 agenda for sustainable development. <https://sustainabledevelopment.un.org/post2015/transformingourworld>: 2015 Contract No.: 31-01-2019.
14. sjukvårdslag H-o. Svensk författningssamling 2017:30. Stockholm, Sweden: Socialdepartementet 2017:13.
15. Wiking E, Johansson S-E, Sundquist J. Ethnicity, acculturation, and self reported health. A population based study among immigrants from Poland, Turkey, and Iran in Sweden. *J Epidemiol Community Health*. 2004;58(7):574-82.
16. Derose KP, Escarce JJ, Lurie N. Immigrants and health care: sources of vulnerability. *Health Aff (Millwood)*. 2007;26(5):1258-68.
17. Wångdahl J. Health literacy among newly arrived refugees in Sweden and implications for health and healthcare: *Acta Universitatis Upsaliensis*; 2017.
18. Wångdahl J, Lytsy P, Mårtensson L, Westerling R. Poor health and refraining from seeking healthcare are associated with comprehensive health literacy among refugees: a Swedish cross-sectional study. *International Journal of Public Health*. 2018;63(3):409-19.
19. Sørensen K, Van den Broucke S, Pelikan JM, Fullam J, Doyle G, Slonska Z, et al. Measuring health literacy in populations: illuminating the design and development process of the European Health Literacy Survey Questionnaire (HLS-EU-Q). *BMC Public Health*. 2013;13(1):948.

20. Almaleh R, Helmy Y, Farhat E, Hasan H, Abdelhafez A. Assessment of health literacy among outpatient clinics attendees at Ain Shams University Hospitals, Egypt: a cross-sectional study. *Public Health*. 2017;151:137-45.
21. Gele AA, Pettersen KS, Torheim LE, Kumar B. Health literacy: the missing link in improving the health of Somali immigrant women in Oslo. *BMC Public Health*. 2016;16(1):1134.
22. Levin-Zamir D, Baron-Epel OB, Cohen V, Elhayany A. The association of health literacy with health behavior, socioeconomic indicators, and self-assessed health from a national adult survey in Israel. *Journal of health communication*. 2016;21(sup2):61-8.
23. Pelikan J, Röthlin F, Canahl K. Introduction to HL measurement procedures of the HLS-EU study, . 2nd European HL Conference; Aarhus2014.
24. Emiral G, Aygar H, Isiktekin B, Göktas S, Dagtekin G, Arslantas D, et al. Health literacy scale-European union-Q16: a validity and reliability study in Turkey. *International Research Journal of Medical Sciences*. 2018;6(1):1-7.
25. Wångdahl JM, Mårtensson L. The Communicative and Critical health literacy scale–Swedish version. *Scandinavian journal of public health*. 2014;42(1):25-31.
26. Wångdahl J, Lytsy P, Mårtensson L, Westerling R. Health literacy among refugees in Sweden—a cross-sectional study. *BMC Public Health*. 2014;14(1):1030.
27. Paige SR, Krieger JL, Stelfefon M, Alber JM, counseling. eHealth literacy in chronic disease patients: an item response theory analysis of the eHealth literacy scale (eHEALS). *Patient Educ Couns*. 2017;100(2):320-6.
28. Paramio GP, Almagro B, Hernando ÁG, Aguaded JG. Validation of the eHealth literacy scale (eHEALS) in Spanish university students. *Rev Esp Salud Publica*. 2015;89(3):329-38.
29. Mitsutake S, Shibata A, Ishii K, Okazaki K, Oka K. Developing Japanese version of the eHealth literacy scale (eHEALS). *Japanese journal of public health*. 2011;58(5):361-71.
30. Soellner R, Huber S, Reder M. The concept of eHealth literacy and its measurement. *Journal of Media Psychology*. 2014.
31. Efthymiou A, Middleton N, Charalambous A, Papastavrou E. The Association of Health Literacy and Electronic Health Literacy With Self-Efficacy, Coping, and Caregiving Perceptions Among Carers of People With Dementia: Research Protocol for a Descriptive Correlational Study. *JMIR research protocols*. 2017;6(11):e224.
32. Diviani N, Dima AL, Schulz PJ. A psychometric analysis of the Italian version of the eHealth literacy scale using item response and classical test theory methods. *J Med Internet Res*. 2017;19(4):e114.
33. Cardoso Tomás C, Pina Queirós PJ, Rodrigues Ferreira TdJ. Analysis of the psychometric properties of the portuguese version of an eHealth literacy assessment tool. *Revista de Enfermagem Referência*. 2014;4(2):19-28.
34. Chang A, Schulz P. The Measurements and an Elaborated Understanding of Chinese eHealth Literacy (C-eHEALS) in Chronic Patients in China. *International journal of environmental research*. 2018;15(7):1553.
35. Stelfefon M, Paige SR, Tennant B, Alber JM, Chaney BH, Chaney D, et al. Reliability and Validity of the Telephone-Based eHealth Literacy Scale Among Older Adults: Cross-Sectional Survey. *J Med Internet Res*. 2017;19(10).
36. Nguyen G, Gambashidze N, Ilyas SA, Pascu D. Validation of the safety attitudes questionnaire (short form 2006) in Italian in hospitals in the northeast of Italy. *BMC Health Serv Res*. 2015;15(1):284.
37. Richtering SS, Morris R, Soh S-E, Barker A, Bampi F, Neubeck L, et al. Examination of an eHealth literacy scale and a health literacy scale in a population with moderate to high cardiovascular risk: Rasch analyses. *PLoS One*. 2017;12(4):e0175372.
38. Koo M, Norman CD, Hsiao-Mei C. Psychometric evaluation of a Chinese version of the eHealth literacy scale (eHEALS) in school age children. *Global Journal of Health Education*. 2012;15(1).

39. Statistiska c. Utländska medborgare i riket efter medborgarskapsland, ålder och kön. År 1973 - 2017. <https://www.scb.se/hitta-statistik/statistik-efter-amne/befolkning/befolkningens-sammansattning/befolkningsstatistik/>: Statistiska, centralbyrån; 2018 [cited 2018 12 October].
40. Terwee CB, Bot SD, de Boer MR, van der Windt DA, Knol DL, Dekker J, et al. Quality criteria were proposed for measurement properties of health status questionnaires. *J Clin Epidemiol*. 2007;60(1):34-42.
41. Guillemin F, Bombardier C, Beaton D. Cross-cultural adaptation of health-related quality of life measures: literature review and proposed guidelines. *J Clin Epidemiol*. 1993;46(12):1417-32.
42. Mokkink LB, Terwee CB, Patrick DL, Alonso J, Stratford PW, Knol DL, et al. The COSMIN study reached international consensus on taxonomy, terminology, and definitions of measurement properties for health-related patient-reported outcomes. *Journal of clinical epidemiology*. 2010;63(7):737-45.
43. Valerio MA, Rodriguez N, Winkler P, Lopez J, Dennison M, Liang Y, et al. Comparing two sampling methods to engage hard-to-reach communities in research priority setting. *BMC Med Res Methodol*. 2016;16(1):146.
44. VanVoorhis CW, Morgan BL. Understanding power and rules of thumb for determining sample sizes. *Tutorials in Quantitative Methods for Psychology*. 2007;3(2):43-50.
45. Nielsen SS, Krasnik A. Poorer self-perceived health among migrants and ethnic minorities versus the majority population in Europe: a systematic review. *International journal of public health*. 2010;55(5):357-71.
46. De Vet HC, Terwee CB, Mokkink LB, Knol DL. *Measurement in medicine: a practical guide*. Cambridge: Cambridge University Press; 2011.
47. Berkman ND, Sheridan SL, Donahue KE, Halpern DJ, Crotty K. Low health literacy and health outcomes: an updated systematic review. *Ann Intern Med*. 2011;155(2):97-107.
48. Palumbo R, Annarumma C, Adinolfi P, Musella M, Piscopo G. The Italian Health Literacy Project: Insights from the assessment of health literacy skills in Italy. *Health Policy*. 2016;120(9):1087-94.
49. Paasche-Orlow MK, Parker RM, Gazmararian JA, Nielsen-Bohlman LT, Rudd RR. The prevalence of limited health literacy. *J Gen Intern Med*. 2005;20(2):175-84.
50. Ng E, Omariba DWR. Immigration, generational status and health literacy in Canada. *Health Educ J*. 2014;73(6):668-82.
51. Easton P, Entwistle VA, Williams B. Health in the 'hidden population' of people with low literacy. A systematic review of the literature. *BMC Public Health*. 2010;10(1):459.
52. Cronbach LJ. Coefficient alpha and the internal structure of tests. *Psychometrika*. 1951;16(3):297-334.
53. McDowell I. *Measuring health: a guide to rating scales and questionnaires*: Oxford University Press, USA; 2006.
54. de Vet HC, Mokkink LB, Mosmuller DG, Terwee CB. Spearman–Brown prophecy formula and Cronbach's alpha: different faces of reliability and opportunities for new applications. *Journal of clinical epidemiology*. 2017;85:45-9.
55. Bujang MA, Baharum N. A simplified guide to determination of sample size requirements for estimating the value of intraclass correlation coefficient: A review. *Archives of Orofacial Science*. 2017;12(1).
56. Rasu RS, Bawa WA, Suminski R, Snella K, Warady B, management. Health literacy impact on national healthcare utilization and expenditure. *International journal of health policy*. 2015;4(11):747.
57. Jaensson M, Dahlberg K, Eriksson M, Nilsson U. Evaluation of postoperative recovery in day surgery patients using a mobile phone application: a multicentre randomized trial. *Br J Anaesth*. 2017;119(5):1030-8.



- 1  
2  
3 58. Dahlberg K, Philipsson A, Hagberg L, Jaensson M, Hälleberg-Nyman M, Nilsson U. Cost-  
4 effectiveness of a systematic e-assessed follow-up of postoperative recovery after day surgery: a  
5 multicentre randomized trial. *Br J Anaesth*. 2017;119(5):1039-46.  
6  
7 59. Dahlberg K, Jaensson M, Nilsson U, Eriksson M, Odenchants S. Holding It Together—A  
8 Qualitative Study of Patients' Perspectives on Postoperative Recovery When Using an e-Assessed  
9 Follow-Up. *JMIR Mhealth Uhealth* 2018;6(5):e10387. 2018;6(5):e10387.  
10  
11  
12  
13  
14  
15  
16  
17  
18  
19  
20  
21  
22  
23  
24  
25  
26  
27  
28  
29  
30  
31  
32  
33  
34  
35  
36  
37  
38  
39  
40  
41  
42  
43  
44  
45  
46  
47  
48  
49  
50  
51  
52  
53  
54  
55  
56  
57  
58  
59  
60

For peer review only

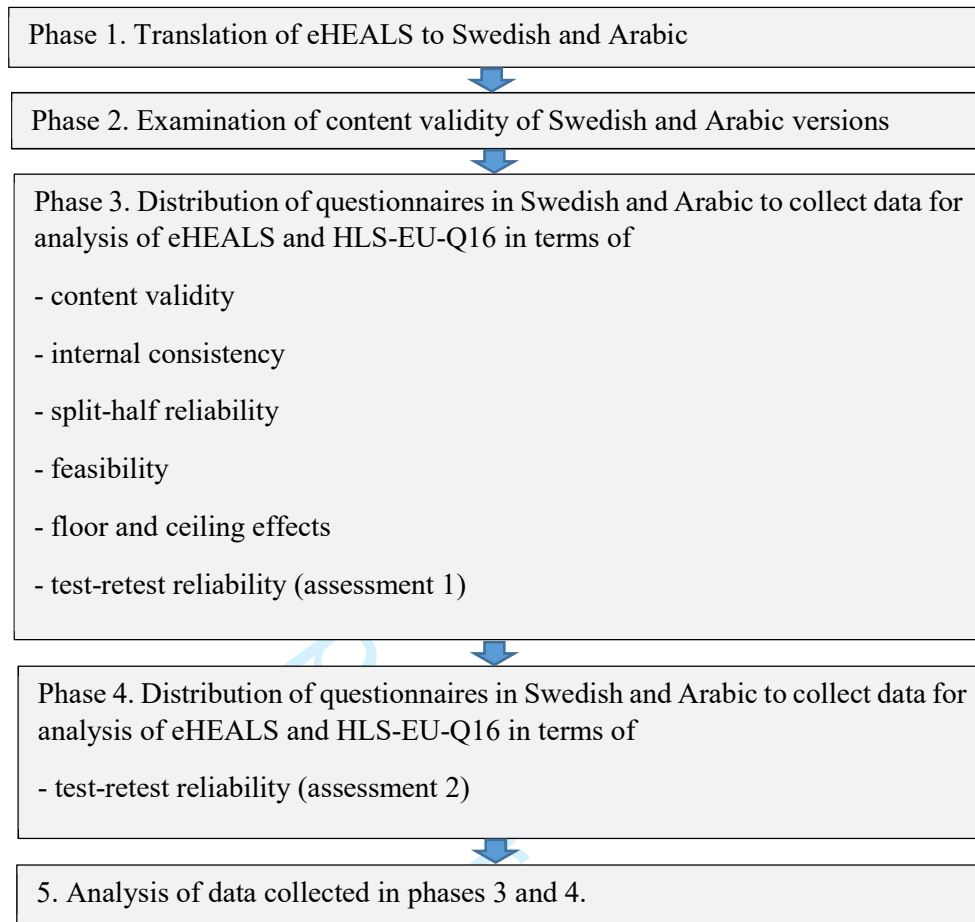

Figure 1. Overview of the research process.



Figure 2. Hypothesis of correlations between eHEALS/HLS-EU-Q16 and various variables.

<sup>1</sup> Item a: How easy/difficult is it for you to find information on treatments of illnesses that concern you?

Item k: How easy/difficult is it for you to judge whether information on health risks in the media (e.g., on television or the internet) is reliable?

Item l: How easy/difficult is it for you to decide how you can protect yourself from illness based on information in media (e.g., in newspapers or leaflets or on the internet)?

Item o: How easy/difficult is it for you to understand information in the media (e.g., from the internet or daily or weekly magazines) on how improve your health?
